# 1 **Canopy position has a profound effect on soybean seed composition**

2

3 Steven C Huber<sup>1,2, ^\*</sup>, Kunzhi Li<sup>2,5, ^</sup>, Randall Nelson<sup>1,2, ^</sup>, Alexander Ulanov<sup>3</sup>, Catherine M.  
4 DeMuro<sup>1, §</sup>, and Ivan Baxter<sup>4\*</sup>

5

6 <sup>1</sup>US Department of Agriculture, Agricultural Research Service, Global Change and  
7 Photosynthesis Research Unit, Urbana, IL, USA.

8 <sup>2</sup>Plant Biology Department, University of Illinois, Urbana-Champaign, IL, USA.

9 <sup>3</sup>Metabolomics Facility, Carver Biotechnology Center, University of Illinois, Urbana-  
10 Champaign, IL, USA.

11 <sup>4</sup>US Department of Agriculture, Agricultural Research Service, Danforth Research Center, St.  
12 Louis, MO, USA.

13 <sup>5</sup>Lab of plant nutrition genetic engineering, Biotechnology Research Center, Faculty of Life  
14 Science and Biotechnology, Kunming University of Science and Technology, Chenggong  
15 Campus Chenggong Kunming 650500, China

16

17 <sup>^</sup>These authors contributed equally to this work

18 \*Correspondence: [ivan.baxter@ars.usda.gov](mailto:ivan.baxter@ars.usda.gov) or [schuber1@illinois.edu](mailto:schuber1@illinois.edu)

19

1 **Abstract**

2 Although soybean seeds appear homogeneous, their composition (protein, oil and mineral  
3 concentrations) can vary significantly with canopy position. Seeds produced at the top of the  
4 canopy have higher concentrations of protein but less oil and minerals such as Mg, Fe, and Cu  
5 compared to seeds produced at the bottom of the canopy. Altering the microenvironment within  
6 the soybean canopy affected the gradients in protein and oil without altering the distribution of  
7 Mg, Fe and Cu, suggesting different underlying mechanisms. Metabolomic analysis of  
8 developing seeds suggests that availability of free asparagine may be a positive determinant of  
9 storage protein accumulation in seeds. Our results establish a new category of seed  
10 heteromorphism and provide an unexpected approach to link agronomic practices to improve  
11 human nutrition and health by using seeds produced in the lower canopy for production of iron-  
12 rich soy foods for human consumption.

13

14

15

## 1 **Introduction**

2 Legumes like soybean can contribute not only protein to the human diet but also minerals like  
3 iron and zinc that are especially important for the health and nutrition of children and women.  
4 According to the World Health Organization, iron (Fe) deficiency is currently the most  
5 widespread mineral deficiency affecting more than 30% of the world's population  
6 (<http://www.who.int/nutrition/topics/ida/en/>). One approach to control this problem is to increase  
7 Fe intake via dietary diversification with Fe-rich foods. Although soybean seeds from a given  
8 plant may appear physically homogeneous, it has long been known that seed produced at the top  
9 of the canopy can have higher protein and less oil compared to seeds from the bottom of the  
10 canopy (Collins and Cartter 1956). Subsequently it was demonstrated that positional effects are  
11 observed with determinate as well as indeterminate soybeans (Escalante and Wilcox 1993a) and  
12 in normal protein as well as high-protein breeding lines (Escalante and Wilcox 1993b). While  
13 these effects on protein and oil concentrations have been documented to occur, they are  
14 nonetheless not widely recognized today and there are no insights concerning possible  
15 physiological mechanisms that may underlie these positional effects. There are many other seed  
16 constituents and the full impact of canopy position on various aspects of seed composition is  
17 unknown.

18 Several factors could affect the development of seeds at the top of the plant differently than  
19 those at the bottom of the canopy. First, flowering in indeterminate soybean plants that were  
20 used in the research occurs first at lower nodes; thus, there is the potential for seeds lower in the  
21 canopy to develop over a longer period. While there is a lot of information about node position  
22 and flowering, there are few reports that have documented differences in duration of the seed fill  
23 period (SFP) as a function of node, although this effect has been demonstrated in cultivar  
24 'Williams79' (Raboy and Dickinson 1987). A second factor is that seeds lower in the canopy  
25 also develop under altered environmental conditions in terms of temperature, irradiance, light  
26 quality and humidity, which are recognized to impact seed composition (Wolf et al. 1982,  
27 Carrera et al. 2011, 2009). The role of canopy microenvironment on seed composition needs  
28 further investigation.

29 In the present study, we grew a core group of ten soybean lines in Urbana, IL, over 3-  
30 year period and monitored seed composition (protein, oil and mineral element concentration) at  
31 maturity as a function of node position. In general, there was a continuum in composition with

1 seed that developed at the top of the canopy having more protein but less oil and reduced  
2 concentrations of minerals such as Mg, Fe, and Cu compared to seeds produced at the bottom of  
3 the canopy. Of particular note was the variation in Fe concentration, which was generally ~20%  
4 higher in seeds from the bottom of the canopy. The differences in mineral concentrations such  
5 as Fe could have direct impact on use of soybeans for human food in countries that primarily  
6 depend on plant protein sources. We also tested several possible developmental and micro-  
7 environmental factors for their ability to influence the seed compositional gradients, and used  
8 metabolomic profiling of developing seeds to investigate biochemical determinants of the protein  
9 and oil gradients. Collectively, the results establish a new type of seed heteromorphism and  
10 provide new insights to some of the underlying factors that may be responsible for the gradients.

11

## 12 **Results**

### 13 **Canopy position affects soybean seed protein, oil and mineral concentrations**

14 We investigated positional effects with a core group of ten soybean lines (*Figure 1—table*  
15 *supplement 1*) grown in Urbana, IL, over a 3-year period. Main stems were harvested at maturity  
16 and divided into four canopy position quadrants and the seeds collected from each quadrant were  
17 analyzed separately for major storage products (protein and oil) and various minerals. Each  
18 canopy gradient was normalized to a mean value of one and the values for each quadrant were  
19 then expressed relative to the normalized mean. In this way, we could compare positional effects  
20 for a given parameter across genotypes and years without the confounding effects of differences  
21 in absolute values, but because the weather in each year of the study differed, the normalized  
22 results are presented separately for each year. Oil concentration decreased progressively from  
23 bottom to top of the canopy and was associated with a reciprocal increase in protein  
24 concentration (*Figure 1A*). Protein and oil concentrations in soybean seeds are usually inversely  
25 related (Wilcox 1998) and this was apparent with variation within the canopy as well. Single  
26 seed weight varied with canopy position with seed produced in the middle portion tending to be  
27 slightly heavier than seeds produced at either the bottom or top of the canopy; however, the  
28 storage product gradients were independent of seed weight variation. Storage product gradients  
29 did not vary significantly across the three years of the study; however, absolute protein and oil  
30 concentrations varied among the three years of the study (*Figure 1—figure supplement 1*). This

1 is perhaps a result of weather that varied substantially in terms of temperature and precipitation  
2 among the three growing seasons (*Figure 1—table supplement 2*).

3 We also found that canopy position significantly affected the seed ionome, which comprises  
4 all of the minerals and trace elements found in mature seeds (*Figure 1B*). While there have been  
5 several studies of the soybean seed ionome (Sha et al. 2012, Myers et al. 2014, McGrath and  
6 Lobell 2013, Ziegler et al. 2013), to our knowledge this is the first report demonstrating variation  
7 with canopy position. *Figure 1B* shows normalized canopy gradient plots for elements where  
8 there was a statistically significant ( $p < 0.01$ ) variation in concentration with position. Several  
9 groups of minerals exhibited common responses with canopy position. The elements Mg, Fe,  
10 Cu, Cd and Zn were present at highest concentrations in seeds from the bottom of the canopy and  
11 decreased progressively to the top of the canopy. Within this group, the profiles for Mg and Fe  
12 were similar to one another in that variation was relatively low and the gradients were almost  
13 identical across the three years. The relative changes in Fe concentration were much greater in  
14 magnitude compared to changes in Mg concentration. Cu, Zn and Cd showed similar patterns,  
15 but were more variable among years. The second group that was apparent included Ca and Sr,  
16 where seeds from the middle of the canopy exhibited the lowest concentrations except in 2010,  
17 when concentrations of both Ca and Sr tended to increase going up the canopy. Finally, Mn  
18 tended to increase in concentration towards the top of the canopy. Ca and Sr, and Cd and Zn,  
19 are chemically similar which may explain their parallel profiles. It is interesting to note that  
20 while Rb is a chemical analog of K and the two are often closely correlated (Baxter 2009), that  
21 was not the case for soybean seeds. It is also noteworthy that 2010 was the one year where  
22 mineral profiles were often distinct from those in 2011 and 2012. All three years were above  
23 normal in terms of temperature, but 2010 was the only year with above normal precipitation.  
24 Thus, water availability may be a major environmental factor impacting positional effects on the  
25 seed ionome, and interestingly some minerals were affected (Ca, Mn, Cu, Zn, Sr) while others  
26 (Mg, Fe, Co, Rb, Cd) were not. We also measured other minerals (B, Na, Al, P, S, K, Ni, As, Se  
27 and Mo) that did not show statistically significant variation with nodal position and are not  
28 presented in Figure 1. *Figure 1—supplemental figure 1* shows non-normalized plots of  
29 minerals that identify differences among metals in absolute abundance. As expected, absolute  
30 concentrations of Mg, S, K, P and Ca were highest ( $> 1000$  ppm); Mn, Fe, Rb, and Zn were

1 intermediate (10 to 100 ppm), and Na, Co, Ni, Cu, Sr, Mo, and Cd were present at trace levels (<  
2 10 ppm).

3 Another way to compare canopy profiles for the minerals measured is to do an overall  
4 correlation matrix of quadrant variation normalized to plot averages. In this way, one can look  
5 across the entire data set for parameters that are correlated based on variation with nodal  
6 position. A strong positive correlation would indicate that both components changed not only in  
7 the same direction but also to the same relative extent. As shown in **Figure 2A**, only a few  
8 strong correlations were apparent among the measured parameters. Variation in seed size did not  
9 significantly correlate with positional variation of any of the measured elements or storage  
10 products. Protein and oil concentrations were strongly negatively correlated, as expected. In  
11 terms of minerals and storage products, the quadrant variation in protein concentration correlated  
12 negatively with Fe and Cu, and positively with Mn. The reciprocal pattern was apparent with oil  
13 concentration. Among the minerals, highly correlated element pairs included Fe-Cu, Ca-Sr, and  
14 Zn-Cu, and between P and S, Zn, and Co. As noted earlier, Ca and Sr are chemical analogs and  
15 frequently correlated (Baxter 2009), but surprisingly, other chemical analog pairs such as K-Rb  
16 were not observed. Fe and Cu were positively paired and have been reported to be positively  
17 correlated in soybean seeds (Vasconcelos, Clemente, and Grusak 2014) but the basis for the  
18 pairing is unknown. Correlations between P and minerals are often considered to reflect  
19 association of the mineral with seed phytate, the principal form of P in seeds (Vreugdenhil et al.  
20 2004).

21 In addition to comparing parameters based on quadrant variation, it is also worthwhile to simply  
22 compare plot averages, which will reflect genetic and environmental effects on absolute values  
23 of the parameters. **Figure 2B** shows a dynamic matrix plot of correlations between plot means.  
24 Compared to the corresponding plot that focused on quadrant variation (**Figure 2A**), many more  
25 strong correlations were apparent when comparing plot means. Protein concentration was  
26 positively correlated with S and Zn (and more weakly with Fe). The correlation with S is  
27 expected as the total seed S has been shown to track closely with high cysteine- and methionine-  
28 containing proteins in the soybean seed (Krishnan et al. 2012). The correlations between protein  
29 content, Zn and Fe could be due to their primary role as cofactors of metalloproteins.  
30 Accordingly, there was a significant negative correlation of Fe, S, and Zn with oil concentration.  
31 Interestingly, there was also a strongly significant negative correlation of P with oil, whereas the

1 positive correlation of P with protein concentration was relatively weak. The majority of mineral  
2 correlations were positive in nature, with a maxi-cluster of Rb, Mn, Sr, Mg, Ni, and Na and a  
3 mini-cluster of Fe, Cu and Zn. The mini-cluster pairs of Fe-Cu and Cu-Zn were noted in the plot  
4 of **Figure 2A**, but several members of the maxi-cluster correlation were not reported in the plot  
5 normalized correlation matrix. For example, Mn and Mg concentrations did not relate to each  
6 other in terms of quadrant variation but were strongly positively correlated based on plot means,  
7 indicating that mineral uptake and allocation among seeds in different quadrants are controlled  
8 separately. Finally, P concentration exhibited a positive correlation with Mn, Fe, Cu, Zn, S and  
9 Co. The link among P and Zn, S and Co concentrations among quadrants was observed, but  
10 when analyzed in terms of plot means the association of P with Mn, Fe, and Cu became apparent  
11 as well. It is worth noting that in terms of plot means, there was no association between Ca and  
12 Sr suggesting that these chemical analogs do not always behave similarly. Finally, there was one  
13 strong negative correlation between Mo and Sr, perhaps suggesting a common component(s) of  
14 the uptake system.

### 15 **Canopy microenvironment impacts seed composition**

16 Our understanding of the environmental factors responsible for the positional effects on seed  
17 composition is limited; however, many microclimatic factors vary from the top to the bottom of  
18 the closed soybean canopy (Baldocchi, Verma, and Rosenberg 1983). Environment is well  
19 known to impact soybean seed protein and oil composition (Rotundo and Westgate 2009).  
20 Therefore, we conducted experiments to evaluate microclimatic differences within the canopy by  
21 thinning plants at flowering to remove the influence of neighboring plants. Removal of  
22 neighboring plants increased protein concentration at the expense of oil in seeds throughout the  
23 canopy of the spaced plants but the changes were greatest in pods lower on the main stem. As a  
24 result, the thinning treatment reduced the positional effect on protein and oil by 50-60% (**Figure**  
25 **3A**). Increased light energy to drive photosynthesis at most leaf positions and increased  
26 temperature at lower positions could both favor increased protein accumulation at lower nodes  
27 thereby reducing the difference between top and bottom seeds; however, while thinning  
28 significantly altered the main stem gradients in major storage products there was relatively little  
29 effect on minerals. As shown in **Figure 3B**, the canopy positional effect on Mg, Fe and Cu was  
30 unaltered by the thinning treatment whereas Ca and Sr were similar to one another and showed a  
31 significant effect of thinning but only in one of the two test years (2010). The general conclusion

1 is that thinning affects the canopy positional effect on some but not all minerals. This suggests  
2 that at least for Mg, Fe and Cu, the transport and homeostasis mechanisms are generally  
3 independent of instantaneous environmental factors and the transport of sucrose and amino acids  
4 into the developing seeds is not the sole factor driving their movement into seeds.

## 6 **Seed fill period and seed composition**

7 Another factor that could contribute to canopy position effects on seed composition is the  
8 duration of the seed-fill period (SFP), which is affected by genetic and environmental factors and  
9 is one of the major determinants of yield potential in soybean (Evans et al. 1995). Soybeans  
10 flower in response to photoperiod and the first flowers form lower in the canopy followed by  
11 flowering at upper nodes. Pods then form in the same order and when fully elongated the  
12 process of seed development is considered to begin when seeds are approximately 0.34  
13 centimeter long (by visual inspection). In general, seeds lower in the canopy fill over a longer  
14 period but at a lower rate compared to seeds at the top of the canopy (Raboy and Dickinson  
15 1987) so that at maturity, final seed size tends to be rather constant through the canopy rather  
16 than increasing progressively from bottom to top of the canopy. We measured the SFPs with our  
17 core group of ten lines and found substantial differences in SFPs at the bottom and top of the  
18 canopy (**Figure 4—supplemental table 3**). Top SFP was generally correlated with bottom SFP,  
19 as would be expected, but the difference in SFP (bottom – top position) was not correlated with  
20 the canopy gradients of protein, oil, or Fe (**Figure 4**). Therefore, factors other than the duration  
21 of the SFP are responsible for the documented variation in composition with nodal position.

## 23 **Iron concentrations of soybean seed products**

24 Our results raise the question of whether soy food products made from seed from different  
25 portions of the canopy would vary in terms of their mineral concentrations. Three of the most  
26 common and simplest products to make from soybean seeds are flour, milk and okara (the  
27 particulate material remaining after preparation of milk). Because Fe is one of the most critical  
28 minerals to human health and anemia is a global epidemic, we focused our initial analysis on the  
29 Fe content of these soy food products. We prepared flour from seven lines, and milk and okara  
30 from four lines and **Figure 5** summarizes the results. With all three products, the concentration  
31 of Fe was highest in products made from seeds produced at the bottom of the canopy and



1 decreased progressively with canopy position of the seeds used. Thus, as would be expected the  
2 concentration of seed Fe affects the concentration of Fe in the flour, milk or okara produced from  
3 those seeds. Although many questions remain, the public health implications of our findings are  
4 apparent. Given that mineral content of seeds, especially Fe, is important our results uncover  
5 another source of variation that can be directly exploited.

6

## 7 **The vegetative soybean ionome**

8 The canopy effect on seed mineral concentration prompted us to look at the distribution of  
9 minerals in the shoots of vegetative plants. Minerals deposited in seeds are derived from  
10 continued uptake from the soil or remobilization of previously accumulated minerals (Waters  
11 and Grusak 2008, Hocking and Pate 1977), and therefore the leaf ionome of the vegetative plant  
12 is relevant to studies of the mature seed ionome. Preliminary studies of the distribution of Fe in  
13 stems, petioles and leaves of ‘Cumberland’ soybean plants indicated that the majority of Fe was  
14 stored in leaves (data not shown). Consequently, we examined the leaf ionome as a function of  
15 canopy position. As shown in **Figure 6**, the concentrations of Mg, Al, Ca, Mn, Fe, Co, As, Se  
16 and Sr were highest in leaves at the bottom of the canopy and decreased progressively to the top  
17 of the canopy. Concentrations of P, S, K, Cu, Zn, Rb, and Mo increased from bottom to top  
18 leaves. Na and Ni were both present at low absolute concentrations and fluctuated but not in a  
19 progressive pattern as for the other minerals. Although leaves at different positions are often  
20 analyzed together (or as part of the ‘shoot’), two previous studies with soybean also reported  
21 differences in mineral concentrations of lower, middle and upper leaves (Drossopoulos,  
22 Bouranis, and Bairaktari 1994) or young and old leaves (corresponding to different node  
23 positions) (Duke et al. 2012) that are generally consistent with our results. The basis for  
24 differential accumulation of foliar minerals at different positions within the canopy is not clear  
25 and will be important to address in future studies. One possible explanation is that the greater  
26 phloem mobility of P and K facilitates their enhanced remobilization to upper nodes whereas  
27 other less mobile elements (e.g. Fe, Ca, and Mg) tend to remain at their point of initial  
28 deposition. This would not readily explain the observed profiles for Cu, Zn and Mo, however,  
29 highlighting the complexities involved in metal homeostasis and the significant variation with  
30 canopy position. Another working hypothesis could be that K, P, Cu, Zn and Mo are mineral  
31 markers of metabolic activity and accumulate in leaves at the top of the canopy that have highest

1 rates of photosynthesis. Because minerals can be remobilized from leaves to developing seeds  
2 (Sankaran and Grusak 2014, Drossopoulos, Bouranis, and Bairaktari 1994, Jiménez et al. 1996),  
3 it is tempting to speculate that canopy seed gradient in Fe and Mg may be related to greater  
4 stores of both metals in leaves lower in the canopy. Opposite patterns were observed for other  
5 minerals (Ca, Mn, K, and Cu) suggesting that remobilization is either mineral specific or not  
6 quantitatively important in delivery of minerals to developing seeds.  
7 A final point to note is that the potential exists for some soil particles to adhere to vegetative  
8 plant parts, especially lower in the canopy, while seeds are protected from soil contamination by  
9 the pods. Since some minerals exhibited opposite patterns, it seems that soil adhesion could not  
10 be completely responsible for the patterns observed.

11

## 12 **Node position and the developing seed metabolome**

13 Developing seeds were analyzed to determine whether canopy position affected seed metabolism  
14 sufficiently to explain the observed differences in protein and oil concentrations at maturity. To  
15 do this, we collected developing seeds from the top and bottom of the canopy at several time  
16 points over a 24-h period (*Figure 7—figure supplement 1*). Because seeds at the top and  
17 bottom of the canopy differed in size on the day of the experiment, seeds from the top of the  
18 canopy were also collected 6 days later when they had reached the same size (fresh weight seed<sup>-1</sup>)  
19 as the bottom seeds on the first collection date. All seeds were at the stage of development  
20 where cell expansion and accumulation of storage compounds (protein and oil) were the  
21 dominant metabolic processes (Collakova et al. 2013). Untargeted metabolite profiling was  
22 conducted for analysis of polar compounds, free amino acids, free fatty acids, and total fatty  
23 acids (*Figure 7—figure supplement 2*).

24 In general, most metabolites did not show diurnal changes in concentration, but there were  
25 differences in concentrations as a function of seed size and node position. The metabolite plots in  
26 *Figure 7* illustrate some of the different patterns observed. The concentration of sucrose (*Figure*  
27 *7A*) in developing seeds did not vary diurnally and remained relatively constant but the  
28 concentration was slightly higher in the smallest seeds (day 1, top seed) compared to the larger  
29 seeds sampled at the bottom position on day 1 or top position on day 7. The decrease in Suc  
30 concentration comparing top seed on day 1 and day 7 likely reflects in part the dilution effect  
31 caused by storage product accumulation as the seeds increased in size by roughly 2-fold. In

1 contrast, the concentration of citrate in developing seeds was roughly equal among the three  
2 samples (**Figure 7B**). These results suggest that seeds actually accumulate sucrose and to a  
3 larger extent citrate as they increase in dry matter during seed fill (thereby negating the dilution  
4 effect caused by seed growth). This also indicates that developing seeds have ample sugars and  
5 organic acids irrespective of size and node position and time of day. In marked contrast to Suc  
6 and citrate were the dramatic differences observed in free Asn concentration (**Figure 7C**), which  
7 was highest in top seed sampled on day 1 (Aug 20), and lowest in bottom seed sampled on the  
8 same day; the difference was roughly 8-fold. Sampling top seed on day 7 (Aug 26), when seed  
9 size was equivalent to that of bottom seed on day 1, still resulted in a ~4-fold elevation of free  
10 Asn concentration. The roughly 2-fold decrease in Asn concentration in seeds at the top of the  
11 canopy from day 1 to day 7 likely reflects the dilution effect of growth. The pattern for Asn  
12 concentration is potentially of interest because free Asn concentration during seed development  
13 correlates with protein concentration at maturity (Pandurangan et al. 2012, Hernandez-Sebastian  
14 et al. 2005, Miller et al. 2008, Herman 2014a). The results obtained in the present study suggest  
15 that greater supply of Asn to developing seeds at the top of the canopy may contribute to the  
16 observed greater accumulation of storage protein.

17 Importantly, Asn was also one of the important metabolites that distinguished the three sets  
18 of seeds collected based on a global metabolite analysis (**Figure 7—figure supplement 3**). Mean  
19 values for Asn, and other protein amino acids are shown in **Figure 8**. The concentrations of the  
20 free amino acids was highest in the small seed (top seed, day 1). Concentrations of Ala, Asn,  
21 Gly, and Thr were substantially higher in top seed at day 7 relative to bottom seed at day 1 (when  
22 seed sizes were similar). Of those amino acids, Asn was present at the highest absolute  
23 concentrations and may contribute to the storage protein biosynthesis either by acting as a signal  
24 metabolite or providing substrate for protein biosynthesis.

25

26

## 27 Discussion

28 There are two major conclusions that can be drawn from the present study. First, the position  
29 along the main stem at which soybean seeds develop has a profound impact on seed composition,  
30 affecting the concentrations of protein, oil and minerals at maturity. Second, the canopy position  
31 effects on seed mineral concentrations (in particular Fe) are sufficiently large that there may be

1 direct implications for human nutrition in countries where plants are the main source of protein  
2 and soybeans are used for human food. These conclusions are discussed in more detail below.

3

#### 4 **Positional effects on seed protein and oil concentration are broadly observed**

5 Results of the present study demonstrate that for 10 lines grown over a period of 3 years there  
6 were remarkably consistent gradients in protein and oil concentrations in mature seeds as a  
7 function of nodal position (**Figure 1A**). Increased concentration of oil in seeds from lower nodes  
8 could result from the increased duration of the SFP documented for lower pods (**Figure 4—table**  
9 **supplement 1**) because the accumulation of oil in seeds often starts earlier than protein (Saldivar  
10 et al. 2011, Rotundo and Westgate 2009). However, oil accumulation tends to plateau before  
11 protein accumulation and therefore, percent oil will often decrease with increasing duration of  
12 the SFP rather than increase. In the present study, the protein and oil concentration gradients  
13 from bottom to top of the canopy were not correlated with the difference in SFP between the two  
14 positions (**Figure 4**) and thus it appears that SFP does determine the observed gradients in  
15 protein and oil concentration. Micro-environment appears to be a factor controlling protein and  
16 oil concentration gradients in the canopy because removal of neighboring plants at flowering  
17 increased protein concentration at all positions and decreased the difference between top and  
18 bottom nodes (**Figure 3**). While it is not clear which micro-environmental factor(s) might  
19 actually be involved, we suggest that increased light energy reaching lower leaves may be a  
20 contributing factor. Metabolomic analysis of developing seeds that identified free Asn as one of  
21 the primary metabolites distinguishing seeds at the bottom and top of the canopy supports this  
22 conclusion. Asparagine is the major free amino acid in developing soybean seeds and differences  
23 in Asn concentration during development are positively correlated with protein concentration at  
24 seed maturity (Pandurangan et al. 2012, Hernandez-Sebastia et al. 2005). Furthermore, over-  
25 expression of asparaginase in soybean, driven by an embryo-specific promoter, resulted in a  
26 reduction in free Asn concentration during development and reduced protein concentration in  
27 mature seed, measured by nitrogen analysis (Pandurangan et al. 2015). Collectively, these results  
28 suggest that free Asn is a sensor or regulator of processes that determine protein accumulation in  
29 soybean seeds (Herman 2014b). Our results are consistent with this hypothesis and suggest that  
30 differences in free Asn concentration may explain the position effects on seed protein (and oil)  
31 concentration. Nitrogen and carbon flux into pods is largely provided by nearest sources

1 (Streeter and Jeffers 1979, Seddigh and Jolliff 1986) including the nearest trifoliolate leaves. We  
2 speculate that decreased light at lower positions in the closed canopy (i.e., with neighboring  
3 plants) would reduce leaf metabolism as well as the xylem flux of ureides and/or nitrate from  
4 roots to the lower leaves, thereby restricting the ability of those leaves to provide Asn (and Gln)  
5 to developing seeds. In contrast, removal of neighboring plants (in the ‘thinned’ plant treatment)  
6 would increase light at lower nodes thereby enhancing overall leaf metabolism and the flux of  
7 reduced nitrogen to subtending pods resulting in increased protein (and reduced oil)  
8 accumulation.

9

### 10 **Positional effects on seed mineral concentration are documented**

11 The concentration of minerals in seeds reflects the combined action of transport processes and  
12 regulation at multiple steps starting with mobilization from the soil, uptake into the root, and  
13 transport to the shoot for distribution among organs (Grusak, DellaPenna, and Welch 1999,  
14 Waters and Grusak 2008). Deposition of some minerals in seeds can also involve remobilization  
15 from leaves during seed filling (Hocking and Pate 1977, Grusak, DellaPenna, and Welch 1999),  
16 and it is interesting that different minerals show fundamentally different profiles of accumulation  
17 in seeds as a function of canopy position. These differences could reflect alternate routes from  
18 the apoplast to the symplast or differences in mobility in the phloem. Interestingly, minerals that  
19 tended to have highest concentrations in seeds at the bottom of the canopy (e.g., Mg, Fe, and Cu)  
20 are considered to have better phloem mobility compared to the minerals that tended to  
21 concentrate in the top of the canopy (e.g. Mn and in some cases Ca) that are considered to have  
22 poor phloem mobility. These results suggest that remobilization from leaves may be playing  
23 some role at least in the positional effects on the mature seed ionome.

24 While multiple seed constituents exhibited canopy concentration gradients, it seems  
25 unlikely that they are all caused by the same factors. Changing the microenvironment altered the  
26 protein and oil gradients but did not affect observed gradients for most of the minerals (**Figure**  
27 **3**). Furthermore, while the slope of many gradients changes across lines, treatment and year, the  
28 way that they change is not well correlated between the different constituents, as illustrated in the  
29 plot normalized correlation matrix (**Figure 2A**), where relatively few strong correlations among  
30 the various parameters were apparent. However, numerous correlations were apparent when  
31 mean plot values were compared (**Figure 2B**). Several minerals (e.g., P, Mn, Fe, Zn, S, and Co)

1 had a negative relationship with oil concentration and increased with protein concentration.  
2 Thus, some coordination between seed storage product accumulation and mineral uptake into  
3 seeds is evident. However, the results suggest that total uptake of a mineral and the allocation  
4 among nodal positions are controlled by different mechanisms, and in general, canopy positional  
5 effects on minerals and protein/oil appear to be controlled by distinct mechanisms. Future  
6 studies will be required to sort out the mechanisms involved.

### 7 8 **Human nutrition implications for variation in seed composition**

9 Soybeans are valued for their protein and oil content, but when used for human nutrition the  
10 content of minerals such as iron and zinc is also critically important. On a global scale, human  
11 iron deficiency is one of the most prevalent nutritional disorders (McLean et al. 2009) especially  
12 in countries where plant-based diets are prominent. As discussed above, nodal position affected  
13 the concentration of several minerals such as Mg, Fe, and Cu that were present at higher  
14 concentrations in seeds produced at the bottom of the canopy. Iron is of particular interest and  
15 was generally 20% higher in seeds produced lower in the canopy relative to the top and as  
16 expected, differences in seed iron concentrations affected the concentration of iron in soy food  
17 products made from those seeds. Soy flour preserved more Fe than did milk/okara. Perhaps  
18 mineral retention improvement through product preparation is possible. An immediate  
19 application of our results with respect to human nutrition would be to use seeds from the top and  
20 bottom halves of the canopy for different purposes, with seeds produced in the lower half  
21 reserved for production of iron-rich soy foods for human consumption. Thus, knowledge of  
22 these canopy position effects provides an unexpected approach to link agronomic practices to  
23 improve human nutrition and health.

### 24 25 **New type of seed heteromorphism and implications for climate change impacts**

26 Seed heteromorphism is well established (Matilla, Gallardo, and Puga-Hermida 2005) but  
27 the seed heterogeneity documented here establishes a new category where an individual plant  
28 produces a continuum of seeds that differ in major aspects of their composition (protein, oil, and  
29 minerals) but are morphologically very similar. Overall, our results raise a number of questions  
30 and directions for future research. For example, it would be interesting to explore whether there  
31 are positional effects on soybean seed functional traits such as seed vigor or seedling stress

1 tolerance. Because environment during reproductive development of plants is now recognized to  
2 broadly impact seed properties, such as growth performance and stress tolerance of the progeny  
3 (Biodner et al. 2007, Tricker et al. 2013), it will be interesting to further explore similar  
4 properties of soybean seed produced at the different parts of the canopy. Our results also raise  
5 the question of whether similar effects occur in other species including non-domesticated plants  
6 where there might be some ecological significance.

7 Another area that will be interesting to explore is the impact of elevated CO<sub>2</sub> on the  
8 canopy positional effects described in the present study. It was recently reported (Myers et al.  
9 2014, Loladze 2014) that grain from many species, including soybean, have lower concentrations  
10 of Zn and Fe when plants are grown at elevated CO<sub>2</sub> thereby uncovering a new climate change  
11 challenge to global health. The meta-analysis established a ~5% reduction in soybean seed Fe  
12 and Zn concentrations at high CO<sub>2</sub>. It is relevant to note that variation in seed Fe concentration  
13 with node position established in the present study is substantially larger (4-fold greater)  
14 compared to the impact of climate change on mean seed Fe concentration. Therefore, our results  
15 are likely to be meaningful from a quantitative standpoint and have important implications for  
16 examining the impact of climate change on the seed ionome. For example, it will be interesting  
17 to determine how this overall reduction in mean seed Fe concentration at elevated CO<sub>2</sub> is related  
18 (if at all) to canopy position effects; is Fe reduced 5% in seeds at nodes throughout the canopy  
19 or are certain positions affected to a greater degree than others? Identifying the molecular  
20 mechanisms underlying canopy gradients in composition may provide new approaches to  
21 controlling soybean seed quality for various uses, including food for human consumption under  
22 conditions of global climate change.

23

## 24 **Materials and Methods**

### 25 **Plant growth and sampling**

26 Soybean lines were grown at the University of Illinois South Farm, Urbana, IL, in a  
27 randomized complete block design with three replicates each year. Each plot consisted of three  
28 rows 2.5 m long, with 0.75 m between rows and a planting density of roughly 30 seeds m<sup>-1</sup>.  
29 To produce the thinning treatment, all but three plants were removed from each row shortly after  
30 flowering. Delaying thinning until after the reproductive period had begun minimized branching  
31 on the remaining plants. Approximately 20 cm of plants were thinned from the ends of each row

1 and the third plant was left in the middle in the row. The remaining plants were spaced  
2 approximately 1 m apart.

3 Plants were harvested at maturity. All plants were cut close to ground level and brought  
4 into the laboratory. Each stem was divided into four quadrants and the stem fractions in each  
5 quadrant were threshed together for each plot. Only normal-sized plants were included in the  
6 analysis, and extremely small, wrinkled or off-color seeds were manually removed from all  
7 samples before analysis.

8

### 9 **Soy products**

10 To produce flour, soybeans were blanched (boiled for ~25 minutes) and then baked  
11 before grinding. To produce soymilk and okara (remaining solids), soybeans were blanched  
12 (boiled for ~5 min) twice and then ground in water and cooled slightly. The soymilk (liquid  
13 phase) and okara (solid phase) were separated using a cheesecloth and then dried separately and  
14 reground before analysis.

### 15 **Seed storage product analysis**

16 Protein and oil were measured with an Infratech 1241 Grain Analyzer (FOSS Analytical  
17 AB, Höganäs, Sweden), which is a true Near Infrared Transmission instrument that generates a  
18 spectrum from 850 to 1050 nm via the monochrome light source and mobile grating system. A  
19 50-ml seed sample was used that allowed for 10 subsample readings reported on a 13 % moisture  
20 basis.

21

### 22 **Ionic analysis**

23 Seed analysis was conducted as described in Ziegler et al. 2012. Briefly, single seeds  
24 from each quadrant were weighed using a custom built seed weighing robot and then digested in  
25 concentrated nitric acid before loading onto an Elan ICP-MS. Internal standards were used to  
26 control for differences in dilution and sample injection. Leaf and soy products were analyzed in  
27 the same manner except that samples were added to digestion tubes by hand and weighed.  
28 Custom scripts were used to correct for internal standards and correct for sample weight.

29

### 30 **Metabolomic analysis**



1 Metabolome analysis was done through Metabolomics Center, Roy J. Carver  
2 Biotechnology Center, University of Illinois at Urbana-Champaign. Frozen seeds with attached  
3 seed coats were homogenized in liquid nitrogen and about 25 mg FW was extracted at room  
4 temperature with 1 mL of 50% methanol followed by addition of 800  $\mu$ l of methanol:chloroform  
5 (1:2) as outlined in **Figure 7—supplemental figure 2**. Each extraction was followed by  
6 centrifugation (5 min at 15,000 g), and the supernatants were collected. With the exception of  
7 samples for analysis of coenzymes, final extracts were evaporated under vacuum at  $-60^{\circ}\text{C}$  and  
8 subjected to GC/MS analysis.

9  
10 Metabolic profiling: Dried extracts were derivatized with 100  $\mu$ L methoxyamine hydrochloride  
11 (40 mg/ml in pyridine) for 90 min at  $50^{\circ}\text{C}$ , then with 100  $\mu$ L MSTFA at  $50^{\circ}\text{C}$  for 120 min, and  
12 following 2-hour incubation at room temperature. 5  $\mu$ L of the internal standard (hentriacontanoic  
13 acid, 10 mg/mL) was added to each sample prior to derivatization. Metabolites were analyzed  
14 using a GC-MS system (Agilent Inc, CA, USA) consisting of an Agilent 7890 gas  
15 chromatograph, an Agilent 5975 mass selective detector and a HP 7683B autosampler. Gas  
16 chromatography was performed on a ZB-5MS (60m $\times$ 0.32mm I.D. and 0.25 $\mu$ m film thickness)  
17 capillary column (Phenomenex, CA, USA). The inlet and MS interface temperatures were  $250^{\circ}\text{C}$ ,  
18 and the ion source temperature was adjusted to  $230^{\circ}\text{C}$ . An aliquot of 1  $\mu$ L was injected with  
19 the split ratio of 10:1. The helium carrier gas was kept at a constant flow rate of 2 ml/min. The  
20 temperature program was: 5-min isothermal heating at  $70^{\circ}\text{C}$ , followed by an oven temperature  
21 increase of  $5^{\circ}\text{C min}^{-1}$  to  $310^{\circ}\text{C}$  and a final 10 min at  $310^{\circ}\text{C}$ . The mass spectrometer was  
22 operated in positive electron impact mode (EI) at 69.9 eV ionization energy at m/z 30-800 scan  
23 range.

24  
25 Amino acid analysis: A 20  $\mu$ l aliquot of the internal standard DL-chlorophenylalanine (1mg/ml  
26 in 0.1M HCl) was added to the extracts, dried under vacuum, derivatized with 50  $\mu$ l of neat N-  
27 Methyl-N-tert-butyldimethylsilyltrifluoroacetamide (MTBSTFA), and 50  $\mu$ L of acetonitrile at  $80^{\circ}\text{C}$   
28 for 4 h, cooled to room temperature and centrifuged briefly to remove condensate from the  
29 top of tube prior to injection of 1  $\mu$ L at 5:1 split ratio into the GC/MS system, which consisted of  
30 an Agilent 6890N (Agilent Inc, Palo Alto, CA, USA) gas chromatograph, an Agilent 5973 mass  
31 selective detector and Agilent 7683B autosampler. Gas chromatography was performed on a 60

1 m ZB-5MS column with 0.32 mm inner diameter (I.D.) and 0.25  $\mu\text{m}$  film thickness  
2 (Phenomenex, CA, USA) with injection temperature and MSD transfer line of 230  $^{\circ}\text{C}$  both, and  
3 the ion source adjusted to 230 $^{\circ}\text{C}$ . The helium carrier gas was set at a constant flow rate of 2 ml  
4  $\text{min}^{-1}$ . The temperature program was 5 min at 150  $^{\circ}\text{C}$ , followed by an oven temperature ramp of  
5 5  $^{\circ}\text{C min}^{-1}$  to 315  $^{\circ}\text{C}$  for a final 3 min. The mass spectrometer was operated in positive electron  
6 impact mode (EI) at 69.9 eV ionization energy in m/z 50-800 scan range. Acquired data were  
7 normalized to the internal standard (DL-p-Chlorophenylalanine) and sample fresh weight.  
8 Amino acid concentrations were calculated based on 2ug/ml – 75ug/ml standard curves.

9  
10 Free fatty acids, total fatty acids and coenzymes were also measured and values obtained used in  
11 the global analysis, but specific results are not presented. Detailed methods for the analysis are  
12 available on request.

13  
14 The spectra of all chromatogram peaks were compared with electron impact mass spectrum  
15 libraries NIST08 (NIST, MD, USA), W8N08 (Palisade Corporation, NY, USA), and a custom-  
16 built database (460 unique metabolites). All known artificial peaks were identified and removed.  
17 To allow comparison between samples, all data were normalized to the corresponding internal  
18 standard and the sample fresh weight (FW). The spectra of all chromatogram peaks were  
19 evaluated using the AMDIS 2.71 (NIST, MD, USA) program. Metabolite concentrations were  
20 reported as concentrations relative to the internal standard (*i.e.*, target compound peak area  
21 divided by peak area of internal standard:  $N_i = X_i \times X_{\text{IS}}^{-1}$ ) per gram sample weight. The  
22 instrument variability was within the standard acceptance limit (5%).

23  
24 Metabolites with more than 50% of missing data were removed and for the rest of the  
25 metabolites, any missing data was imputed with one-half of the minimum positive value in the  
26 original data assuming their level was below the instrument detection limit. MVA and  
27 visualization was performed with SIMCA-P+ 12.0 software (Umetrics AB, Umeå, Sweden) and  
28 MetaboAnalyst (Xia and Wishart 2011) using log-transformed and autoscaled data and validated  
29 by sevenfold Cross-Validation and permutation with 500 random. To address the problem of  
30 multiple comparisons the False Discovery Rate (FDR) test was adopted. (Storey 2002).

31

1 **Data analysis**

2 Protein, oil, and elemental data were analyzed using R and the packages dplyr, ggplot2,  
3 grid, reshape2, qtlcharts and gplots. All data and analysis scripts used in the analysis are  
4 included as a supplemental file and are available on [www.ionomicshub.org](http://www.ionomicshub.org).

5

6

1  
2  
3  
4  
5  
6  
7  
8  
9  
10  
11  
12  
13  
14  
15  
16  
17  
18  
19  
20  
21  
22  
23  
24  
25  
26  
27  
28  
29  
30  
31  
32  
33  
34  
35  
36  
37  
38  
39  
40  
41

## Acknowledgements

The authors thank Kunming University of Science and Technology (KUST), Kunming City, P.R. China for supporting the visit of Prof. Kunzhi Li to UIUC; Karl E. Weingarter and Marilyn L. Nash for advice on soy food preparation and providing access to the Test Kitchen facility of the National Soybean Research Laboratory at the University of Illinois; Greg Ziegler for expert technical assistance with ionomic analysis and Sarah Schultz for help with field sampling. Support for this work was provided by the United Soybean Board and the USDA-ARS.

## REFERENCES

Baldocchi, Dennis D., Shashi B. Verma, and Norman J. Rosenberg. 1983. "Microclimate in the soybean canopy." *Agricultural Meteorology* 28 (4):321-337. doi: [http://dx.doi.org/10.1016/0002-1571\(83\)90009-2](http://dx.doi.org/10.1016/0002-1571(83)90009-2).

Baxter, Ivan. 2009. "Ionomics: studying the social network of mineral nutrients." *Current Opinion in Plant Biology* 12 (3):381-386. doi: <http://dx.doi.org/10.1016/j.pbi.2009.05.002>.

Biodner, C., C. Goebel, I. Feussner, C. Gatz, and A. Polle. 2007. "Warm and cold parental reproductive environments affect seed properties, fitness, and cold responsiveness in *Arabidopsis thaliana* progenies." *Plant, Cell & Environment* 30 (2):165-175. doi: 10.1111/j.1365-3040.2006.01615.x.

Carrera, Constanza, María José Martínez, Julio Dardanelli, and Mónica Balzarini. 2009. "Water Deficit Effect on the Relationship between Temperature during the Seed Fill Period and Soybean Seed Oil and Protein Concentrations." *Crop Science* 49 (3):990-998. doi: 10.2135/cropsci2008.06.0361.

Carrera, Constanza, María José Martínez, Julio Dardanelli, and Mónica Balzarini. 2011. "Environmental Variation and Correlation of Seed Components in Nontransgenic Soybeans: Protein, Oil, Unsaturated Fatty Acids, Tocopherols, and Isoflavones." *Crop Science* 51 (2):800-809. doi: 10.2135/cropsci2010.06.0314.

Collakova, Eva, Delasa Aghamirzaie, Yihui Fang, Curtis Klumas, Farzaneh Tabataba, Akshay Kakumanu, Elijah Myers, Lenwood Heath, and Ruth Grene. 2013. "Metabolic and Transcriptional Reprogramming in Developing Soybean (*Glycine max*) Embryos." *Metabolites* 3 (2):347-372.

Collins, F. I., and J. L. Cartter. 1956. "Variability in Chemical Composition of Seed From Different Portions of the Soybean Plant1." *Agron. J.* 48 (5):216-219. doi: 10.2134/agronj1956.00021962004800050006x.

Drossopoulos, J. B., D. L. Bouranis, and B. D. Bairaktari. 1994. "Patterns of mineral nutrient fluctuations in soybean leaves in relation to their position." *Journal of Plant Nutrition* 17 (6):1017-1035. doi: 10.1080/01904169409364785.

Duke, Stephen O., Krishna N. Reddy, Kaixuan Bu, and James V. Cizdziel. 2012. "Effects of Glyphosate on the Mineral Content of Glyphosate-Resistant Soybeans (*Glycine max*)." *Journal of Agricultural and Food Chemistry* 60 (27):6764-6771. doi: 10.1021/jf3014603.

Escalante, E. E., and J. R. Wilcox. 1993a. "Variation in Seed Protein among Nodes of Determinate and Indeterminate Soybean near-Isolines." *Crop Science* 33 (6):1166-1168.

- 1 Escalante, E. E., and J. R. Wilcox. 1993b. "Variation in Seed Protein among Nodes of Normal-Protein and  
2 High-Protein Soybean Genotypes." *Crop Science* 33 (6):1164-1166.
- 3 Evans, T. A., J. J. Fuhrmann, R. L. Nelson, and B. L. Vasilas. 1995. "Relationship of nitrogen utilization  
4 patterns with soybean yield and seed-fill period." *Crop Science* 35:809+.
- 5 Grusak, Michael A, Dean DellaPenna, and Ross M Welch. 1999. "Physiologic processes affecting the  
6 content and distribution of phytonutrients in plants." *Nutrition reviews* 57 (9):27-33.
- 7 Herman, E. M. 2014a. "Soybean seed proteome rebalancing." *Front Plant Sci* 5:437. doi:  
8 10.3389/fpls.2014.00437.
- 9 Herman, Eliot. 2014b. "Soybean Seed Proteome Rebalancing." *Frontiers in Plant Science* 5. doi:  
10 10.3389/fpls.2014.00437.
- 11 Hernandez-Sebastia, C., F. Marsolais, C. Saravitz, D. Israel, R. E. Dewey, and S. C. Huber. 2005. "Free  
12 amino acid profiles suggest a possible role for asparagine in the control of storage-product  
13 accumulation in developing seeds of low- and high-protein soybean lines." *J Exp Bot* 56  
14 (417):1951-63. doi: 10.1093/jxb/eri191.
- 15 Hocking, P. J., and J. S. Pate. 1977. "Mobilization of Minerals to Developing Seeds of Legumes." *Annals  
16 of Botany* 41 (6):1259-1278.
- 17 Jiménez, M. P., D. Efrón, A. M. de la Horra, and R. Defrieri. 1996. "Foliar potassium, calcium,  
18 magnesium, zinc, and manganese content in soybean cultivars at different stages of  
19 development." *Journal of Plant Nutrition* 19 (6):807-816. doi: 10.1080/01904169609365163.
- 20 Krishnan, Hari B., Sungchan Jang, Ivan Baxter, and William J. Wiebold. 2012. "Growing location has a  
21 pronounced effect on the accumulation of cancer chemopreventive agent Bowman-Birk  
22 inhibitor in soybean seeds." *Crop Sci* 52 (4). doi: 10.2135/cropsci2011.11.0593.
- 23 Loladze, Irakli. 2014. "Hidden shift of the ionome of plants exposed to elevated CO<sub>2</sub> depletes minerals at  
24 the base of human nutrition." *eLife* 3. doi: 10.7554/eLife.02245.
- 25 Matilla, Angel, Mercedes Gallardo, and María Isabel Puga-Hermida. 2005. "Structural, physiological and  
26 molecular aspects of heterogeneity in seeds: a review." *Seed Science Research* 15 (02):63-76.  
27 doi: doi:10.1079/SSR2005203.
- 28 McGrath, J. M., and D. B. Lobell. 2013. "Reduction of transpiration and altered nutrient allocation  
29 contribute to nutrient decline of crops grown in elevated CO<sub>2</sub> concentrations." *Plant Cell  
30 Environ* 36 (3):697-705. doi: 10.1111/pce.12007.
- 31 McLean, E., M. Cogswell, I. Egli, D. Wojdyla, and B. de Benoist. 2009. "Worldwide prevalence of anaemia,  
32 WHO Vitamin and Mineral Nutrition Information System, 1993-2005." *Public Health Nutr* 12  
33 (4):444-54. doi: 10.1017/S1368980008002401.
- 34 Miller, A. J., X. Fan, Q. Shen, and S. J. Smith. 2008. "Amino acids and nitrate as signals for the regulation  
35 of nitrogen acquisition." *J Exp Bot* 59 (1):111-9. doi: 10.1093/jxb/erm208.
- 36 Myers, S. S., A. Zanobetti, I. Kloog, P. Huybers, A. D. Leakey, A. J. Bloom, E. Carlisle, L. H. Dietterich, G.  
37 Fitzgerald, T. Hasegawa, N. M. Holbrook, R. L. Nelson, M. J. Ottman, V. Raboy, H. Sakai, K. A.  
38 Sartor, J. Schwartz, S. Seneweera, M. Tausz, and Y. Usui. 2014. "Increasing CO<sub>2</sub> threatens human  
39 nutrition." *Nature* 510 (7503):139-42. doi: 10.1038/nature13179.
- 40 Pandurangan, S., A. Pajak, S. J. Molnar, E. R. Cober, S. Dhaubhadel, C. Hernandez-Sebastia, W. M. Kaiser,  
41 R. L. Nelson, S. C. Huber, and F. Marsolais. 2012. "Relationship between asparagine metabolism  
42 and protein concentration in soybean seed." *J Exp Bot* 63 (8):3173-84. doi: 10.1093/jxb/ers039.
- 43 Pandurangan, S., A. Pajak, T. Rintoul, R. Beyaert, C. Hernandez-Sebastia, D. C. Brown, and F. Marsolais.  
44 2015. "Soybean seeds overexpressing asparaginase exhibit reduced nitrogen concentration."  
45 *Physiol Plant*. doi: 10.1111/ppl.12341.
- 46 Raboy, V., and D. B. Dickinson. 1987. "The timing and rate of phytic Acid accumulation in developing  
47 soybean seeds." *Plant Physiol* 85 (3):841-4.

- 1 Rotundo, José L., and Mark E. Westgate. 2009. "Meta-analysis of environmental effects on soybean seed  
2 composition." *Field Crops Research* 110 (2):147-156. doi:  
3 <http://dx.doi.org/10.1016/j.fcr.2008.07.012>.
- 4 Saldivar, Xiaoyu, Ya-Jane Wang, Pengying Chen, and Anfu Hou. 2011. "Changes in chemical composition  
5 during soybean seed development." *Food Chemistry* 124 (4):1369-1375. doi:  
6 <http://dx.doi.org/10.1016/j.foodchem.2010.07.091>.
- 7 Sankaran, R. P., and M. A. Grusak. 2014. "Whole shoot mineral partitioning and accumulation in pea  
8 (*Pisum sativum*)." *Front Plant Sci* 5:149. doi: 10.3389/fpls.2014.00149.
- 9 Seddigh, Majid, and Gary D. Jolliff. 1986. "Remobilization Patterns of C and N in Soybeans with Different  
10 Sink-Source Ratios Induced by Various Night Temperatures." *Plant Physiology* 81 (1):136-141.
- 11 Sha, Z., N. Oka, T. Watanabe, B. D. Tampubolon, K. Okazaki, M. Osaki, and T. Shinano. 2012. "Ionome of  
12 soybean seed affected by previous cropping with mycorrhizal plant and manure application." *J*  
13 *Agric Food Chem* 60 (38):9543-52. doi: 10.1021/jf3024744.
- 14 Storey, John D. 2002. "A direct approach to false discovery rates." *Journal of the Royal Statistical*  
15 *Society: Series B (Statistical Methodology)* 64 (3):479-498. doi: 10.1111/1467-9868.00346.
- 16 Streeter, J. G., and D. L. Jeffers. 1979. "Distribution of Total Non-Structural Carbohydrates in Soybean  
17 Plants Having Increased Reproductive Load." *Crop Science* 19 (5):729-734. doi:  
18 10.2135/cropsci1979.0011183X001900050046x.
- 19 Tricker, Penny, Carlos López, George Gibbings, Paul Hadley, and Mike Wilkinson. 2013.  
20 "Transgenerational, Dynamic Methylation of Stomata Genes in Response to Low Relative  
21 Humidity." *International Journal of Molecular Sciences* 14 (4):6674-6689.
- 22 Vasconcelos, Marta Wilton, Tom Clemente, and Michael A. Grusak. 2014. "Evaluation of constitutive iron  
23 reductase (AtFRO2) expression on mineral accumulation and distribution in soybean (*Glycine*  
24 *max.* L)." *Frontiers in Plant Science* 5. doi: 10.3389/fpls.2014.00112.
- 25 Vreugdenhil, D., M. G. M. Aarts, M. Koornneef, H. Nelissen, and W. H. O. Ernst. 2004. "Natural variation  
26 and QTL analysis for cationic mineral content in seeds of *Arabidopsis thaliana*." *Plant, Cell &*  
27 *Environment* 27 (7):828-839. doi: 10.1111/j.1365-3040.2004.01189.x.
- 28 Waters, B. M., and M. A. Grusak. 2008. "Whole-plant mineral partitioning throughout the life cycle in  
29 *Arabidopsis thaliana* ecotypes Columbia, Landsberg erecta, Cape Verde Islands, and the mutant  
30 line ysl1ysl3." *New Phytol* 177 (2):389-405. doi: 10.1111/j.1469-8137.2007.02288.x.
- 31 Wilcox, James R. 1998. "Increasing Seed Protein in Soybean with Eight Cycles of Recurrent Selection."  
32 *Crop Sci.* 38 (6):1536-1540. doi: 10.2135/cropsci1998.0011183X003800060021x.
- 33 Wolf, R. B., J. F. Cavins, R. Kleiman, and L. T. Black. 1982. "Effect of temperature on soybean seed  
34 constituents: Oil, protein, moisture, fatty acids, amino acids and sugars." *Journal of the*  
35 *American Oil Chemists' Society* 59 (5):230-232. doi: 10.1007/BF02582182.
- 36 Xia, Jianguo, and David S. Wishart. 2011. "Web-based inference of biological patterns, functions and  
37 pathways from metabolomic data using MetaboAnalyst." *Nat. Protocols* 6 (6):743-760.
- 38 Ziegler, Greg, Aimee Terauchi, Anthony Becker, Paul Armstrong, Karen Hudson, and Ivan Baxter. 2013.  
39 "Ionomic Screening of Field-Grown Soybean Identifies Mutants with Altered Seed Elemental  
40 Composition." *The Plant Genome* 6 (2). doi: 10.3835/plantgenome2012.07.0012.

41

1  
2  
3  
4  
5  
6  
7  
8  
9  
10  
11  
12  
13  
14  
15  
16  
17  
18  
19  
20  
21  
22  
23  
24

**Figure Legends:**

**Figure 1.** Canopy Gradients of Seed Composition Traits. For each trait, the data was normalized to the plot average to remove the effect of environment and genotype. The plots display the quadrant average as a line with the 95% confidence interval calculated using standard error as the ribbon. **A)** Percentage protein, percentage Oil and single seed weight. **B)** Elements with a significant ( $p < 1 \times 10^{-10}$ ) effect of gradient in an ANOVA analysis that included Entry, Year and Position.

**Figure 2.** Correlation Plot among Composition Traits. Pearson correlation values between compositional traits. **A)** Correlation across 832 quadrants normalized to the plot average. **B)** Correlation across 208 plot means.

**Figure 3.** Effect of Thinning on Compositional Traits. For each trait, the data was normalized to the plot average to remove the effect of environment and genotype. The plots display the quadrant average as a line with the 95% confidence interval calculated using standard error as the ribbon. **A)** Percentage protein and percentage Oil in 2010. **B)** Elements (from 2010 and 2012) with a significant ( $p < 1 \times 10^{-10}$ ) effect of gradient in an ANOVA analysis that included Entry, Year, Position and thinning.

**Figure 4.** Difference in Top/Bottom composition traits is not correlated with Seed Fill Period. The difference in plot normalized composition between the top quad and the bottom quad for protein, oil and iron plotted versus the difference in seed fill period for 51 plots in 2012.

1 **Figure 5.** Canopy differences in Iron are reflected in food products. Fe content of the products  
2 from 3 replicates of seven lines (flour) and four lines (Milk and Okara). Boxplots display the five  
3 number summary (median, 25, and 75% percentile define the box, with whiskers extending to  
4 1.5 x interquartile range).

5  
6 **Figure 6.** Canopy Gradients of Leaf Composition Traits. For each trait, the data was normalized  
7 to the plot average to remove the effect of environment and genotype. The plots display the  
8 quadrant average as a line with the 95% confidence interval calculated using standard error as  
9 the ribbon. Elements with a significant ( $p < 1 \times 10^{-10}$ ) effect of gradient in an ANOVA analysis  
10 that included Entry, Collection Date and Position.

11

12 **Figure 7.** Concentrations of selected primary metabolites in developing seeds. **A**, Suc; **B**,  
13 citrate; and **C**, Asn. Boxplots display the five number summary (median, 25, and 75% percentile  
14 define the box, with whiskers extending to 1.5 x interquartile range) for three replicates at each  
15 sampling time: 7AM, 12N, 7PM and the following morning at 7AM. The grey vertical bars  
16 represent the intervening night period. Suc and citrate values are relative concentrations, while  
17 Asn is presented as  $\mu\text{g (g DW)}^{-1}$ .

18

19 **Figure 8.** Concentrations of free amino acids in developing seeds. Boxplots display the five  
20 number summary (median, 25, and 75% percentile define the box, with whiskers extending to  
21 1.5 x interquartile range) for values from each sampling interval (3 replicates and 4 time points  
22 are merged within each box) and nodal position. Ornithine levels reflect both ornithine and  
23 arginine as arginine is converted to ornithine during sample prep for GC-MS. D1.bot, D1.top and  
24 D7.top refer to the samples collected on day one top and bottom quadrants and the day seven top  
25 quadrant respectively.

26



**A**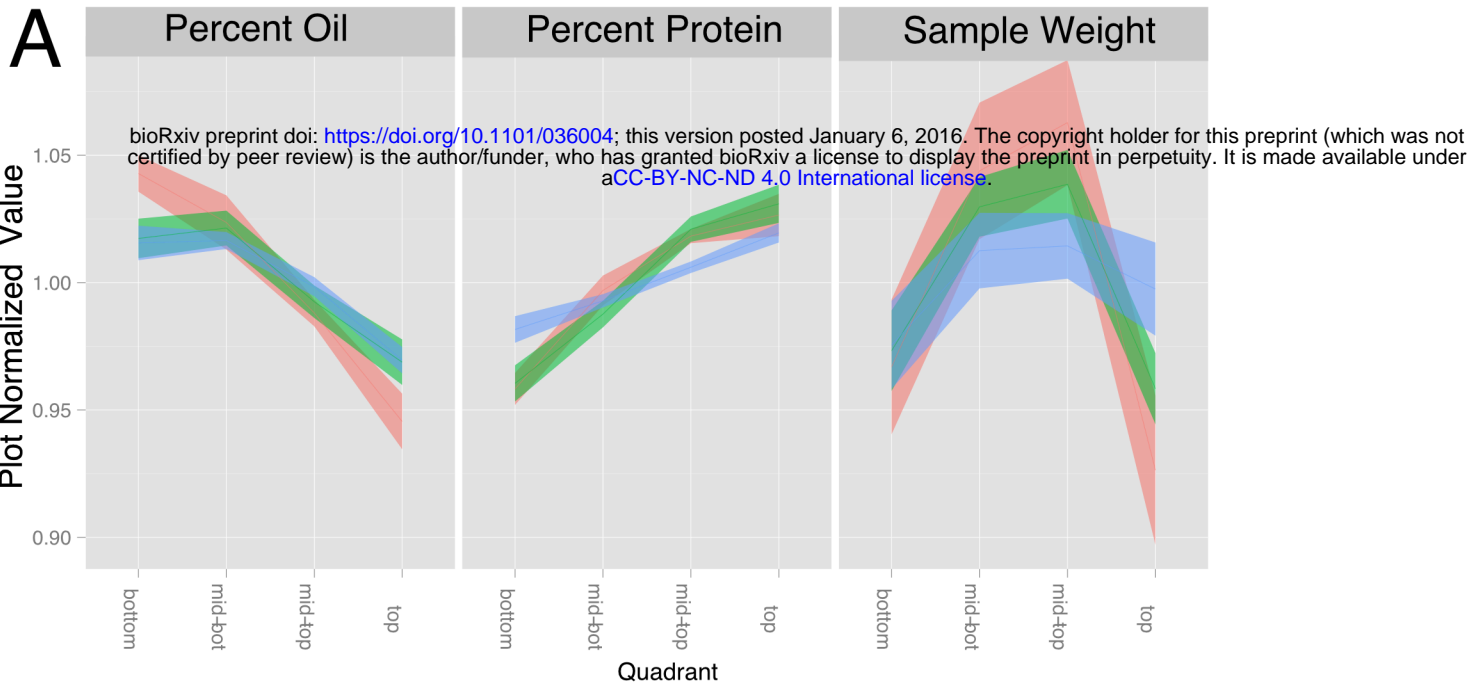**B**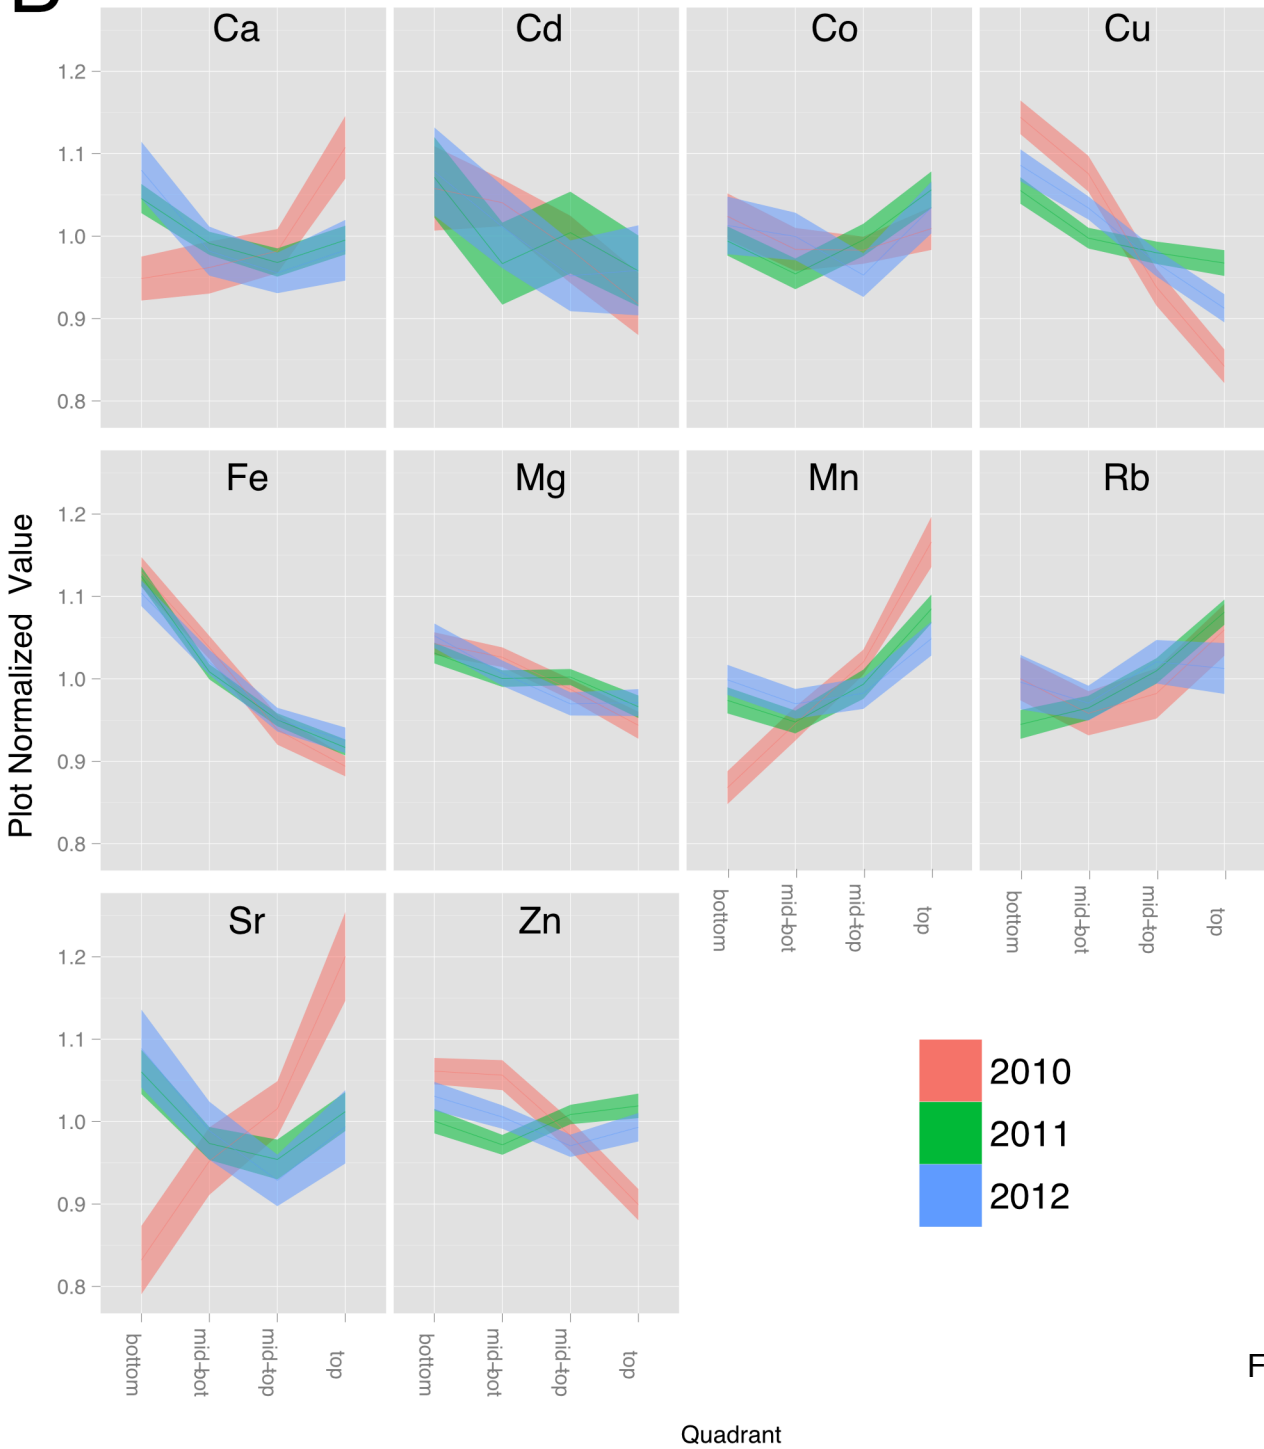

Figure 1

A

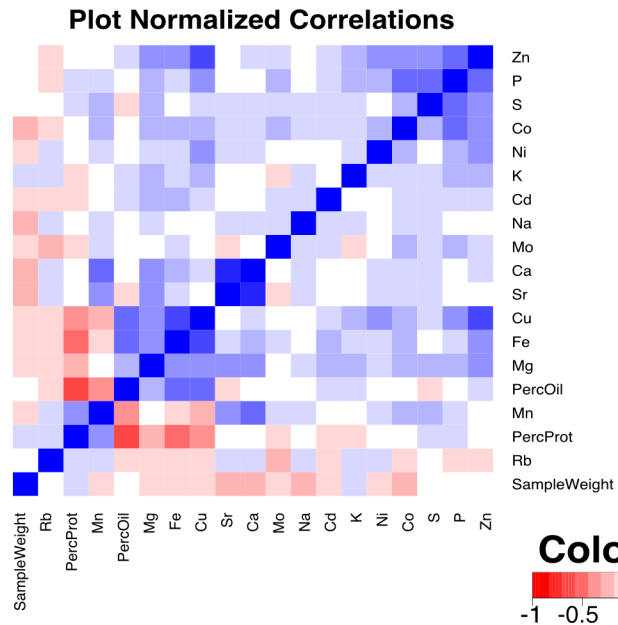

B

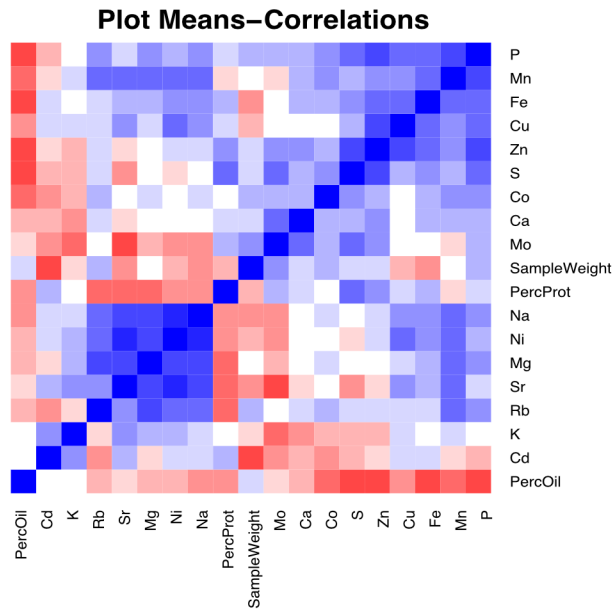

Figure 2

**A**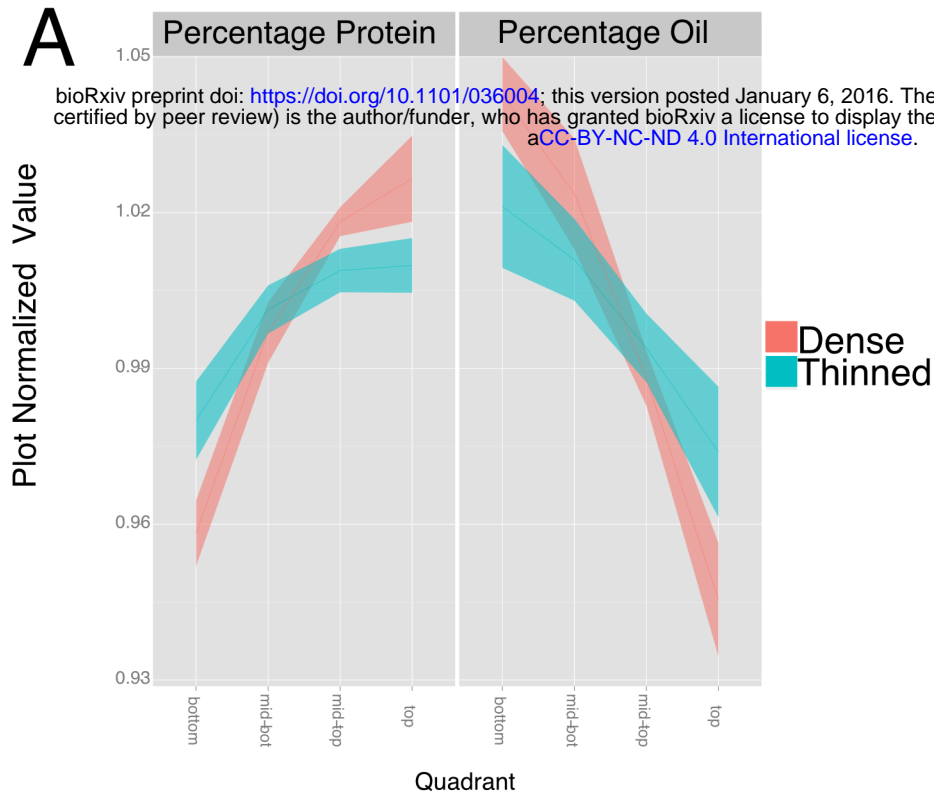**B**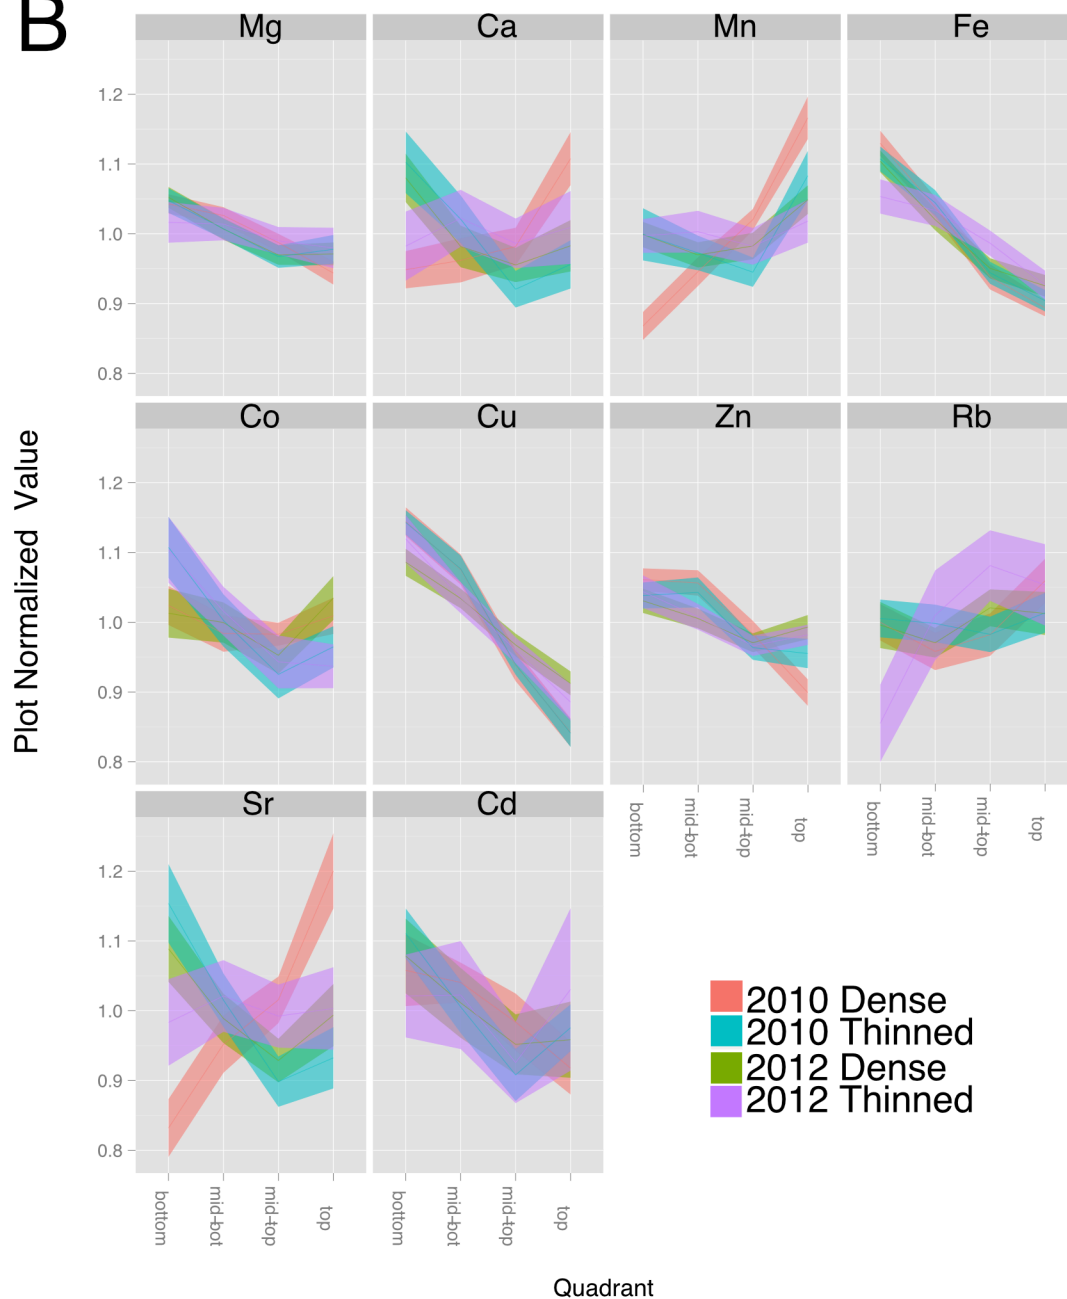

Figure 3

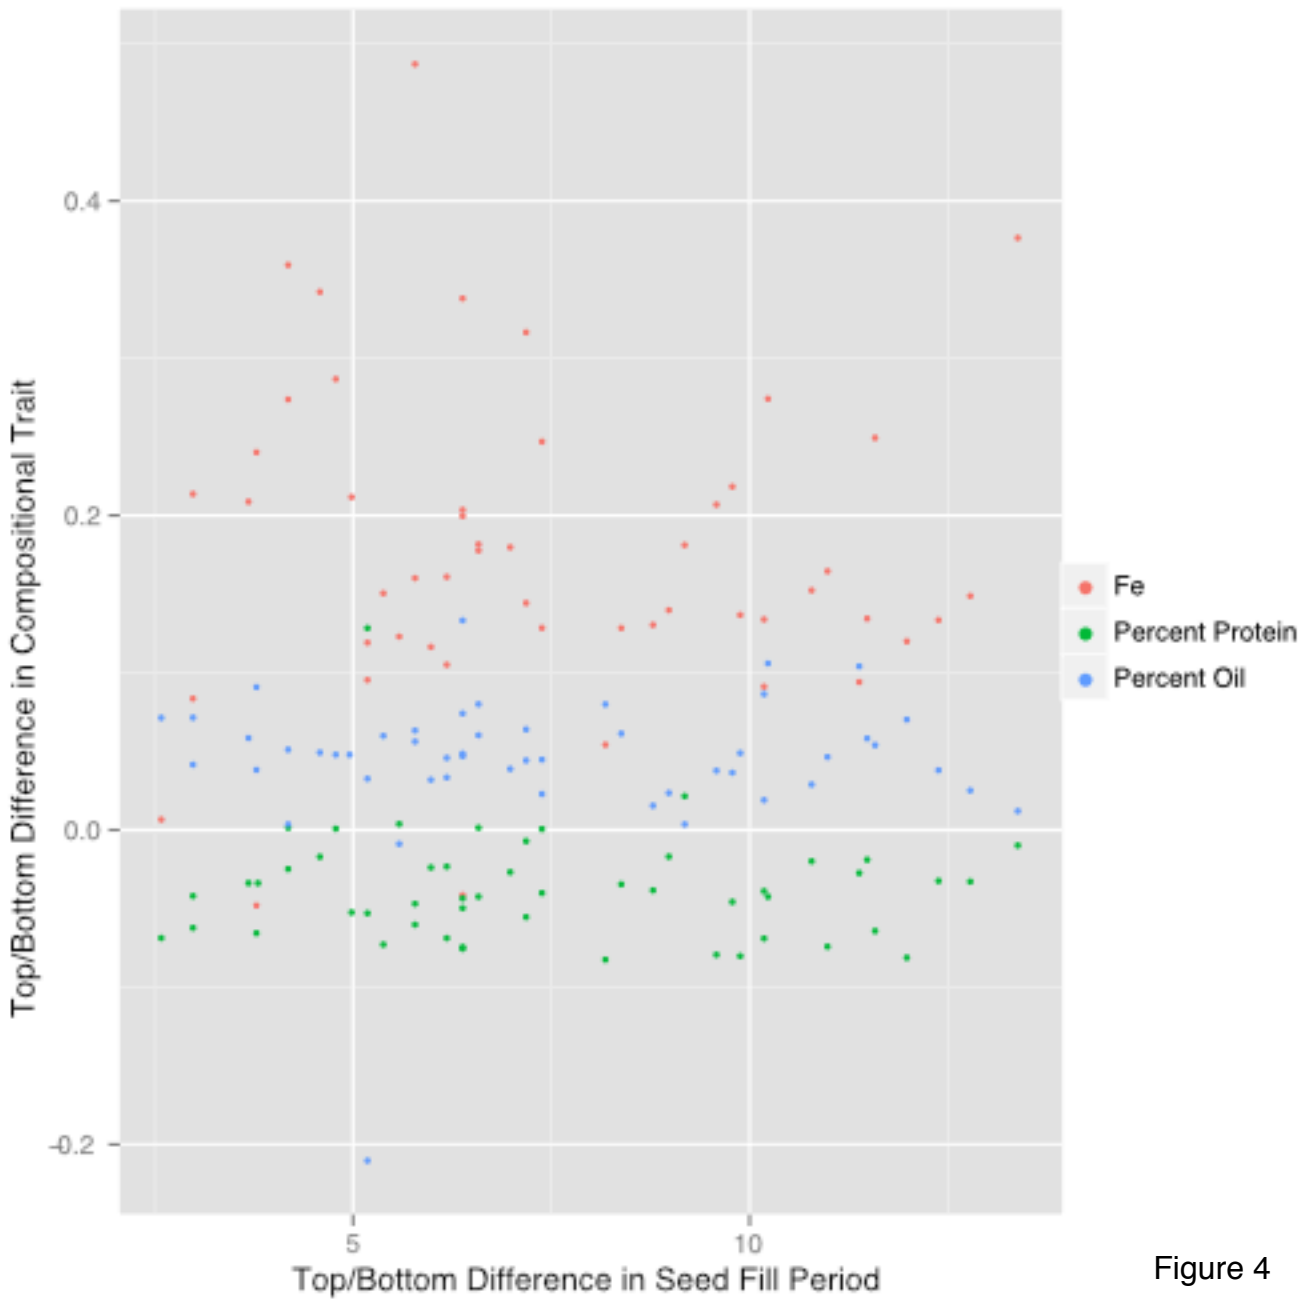

Figure 4

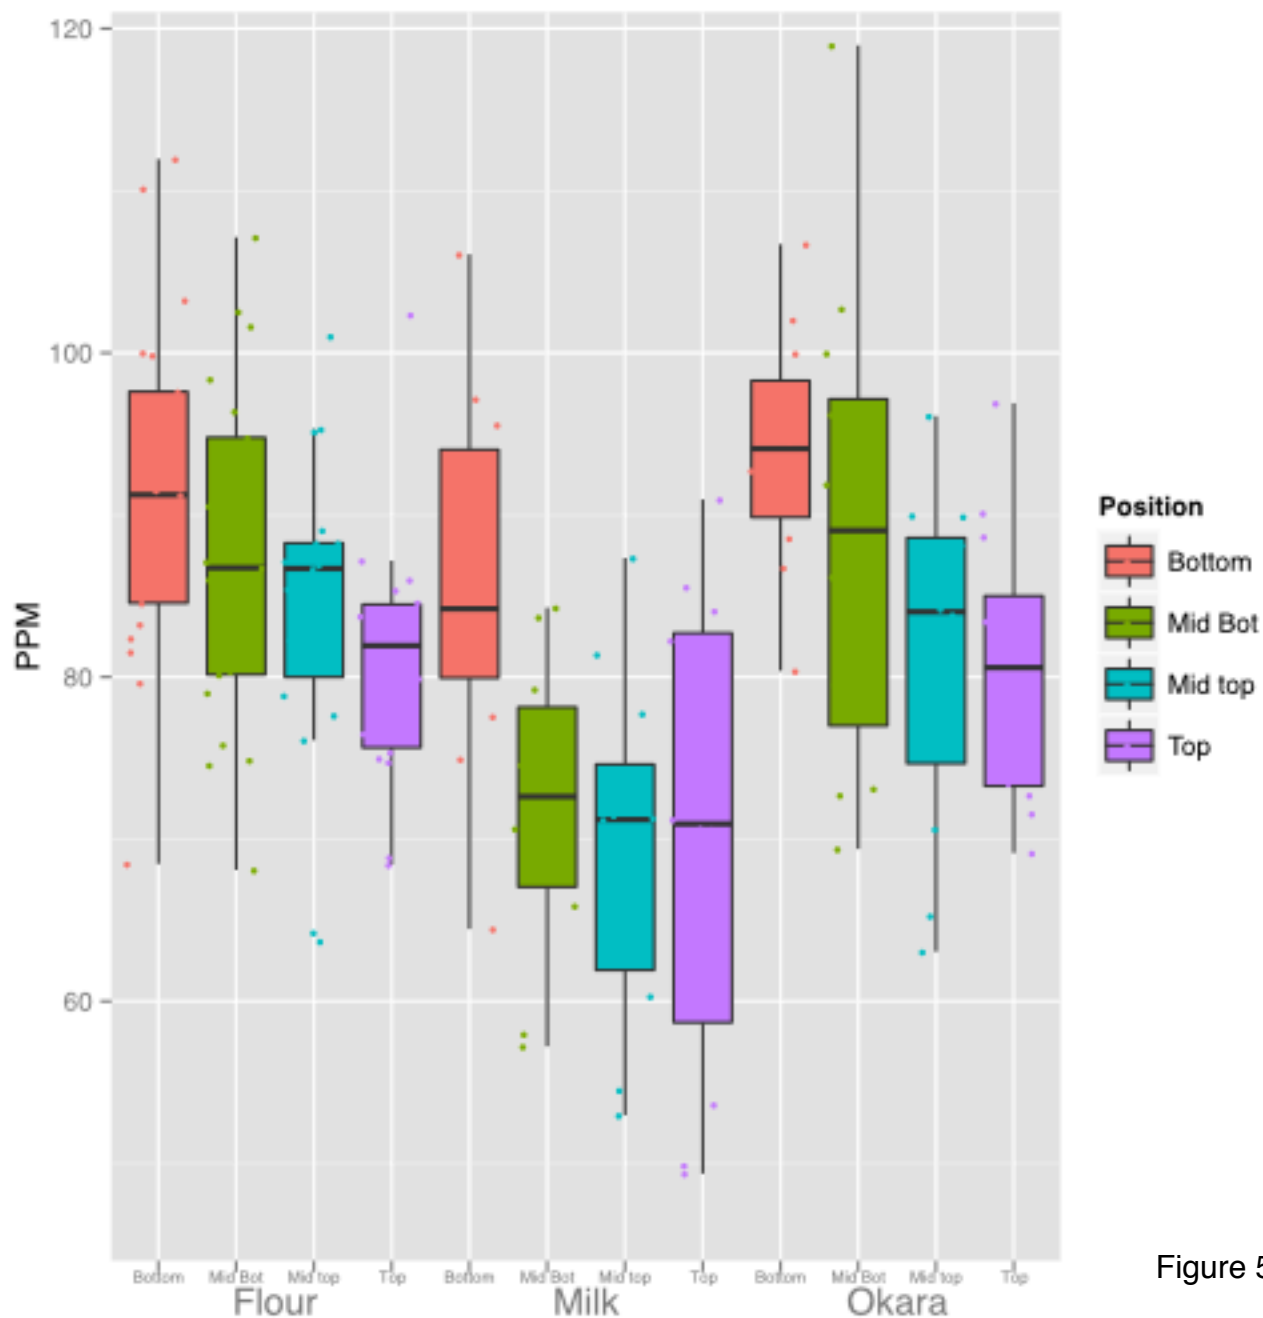

Figure 5

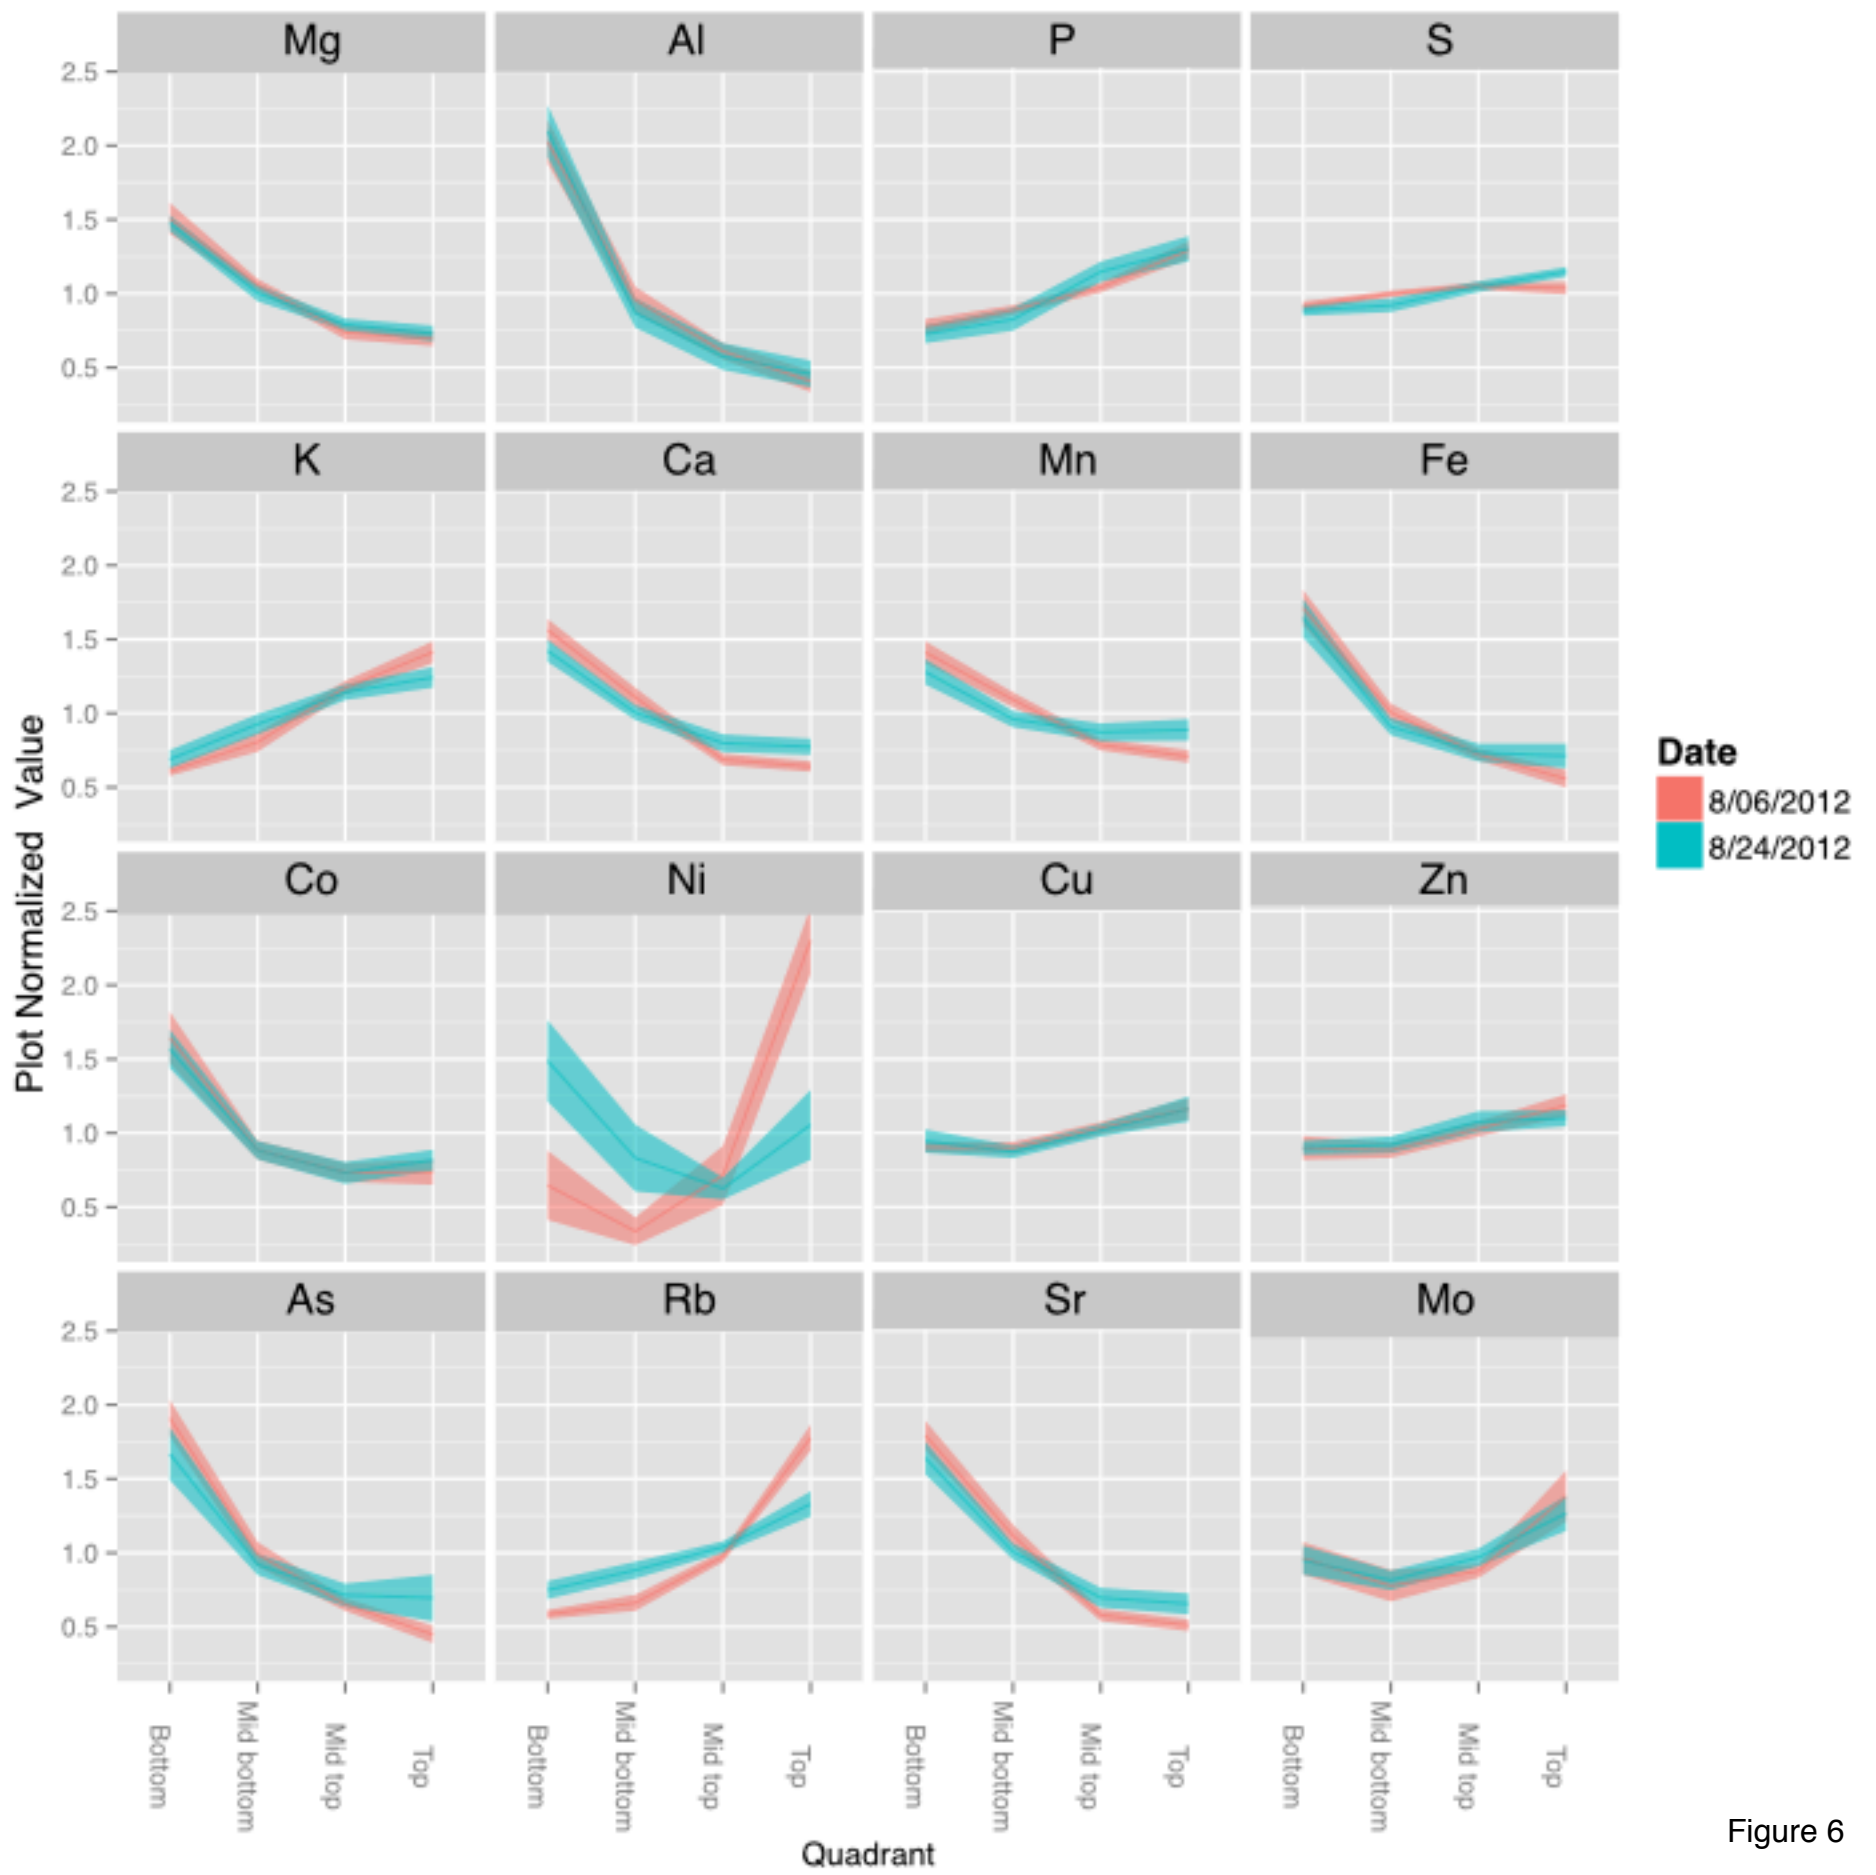

Figure 6

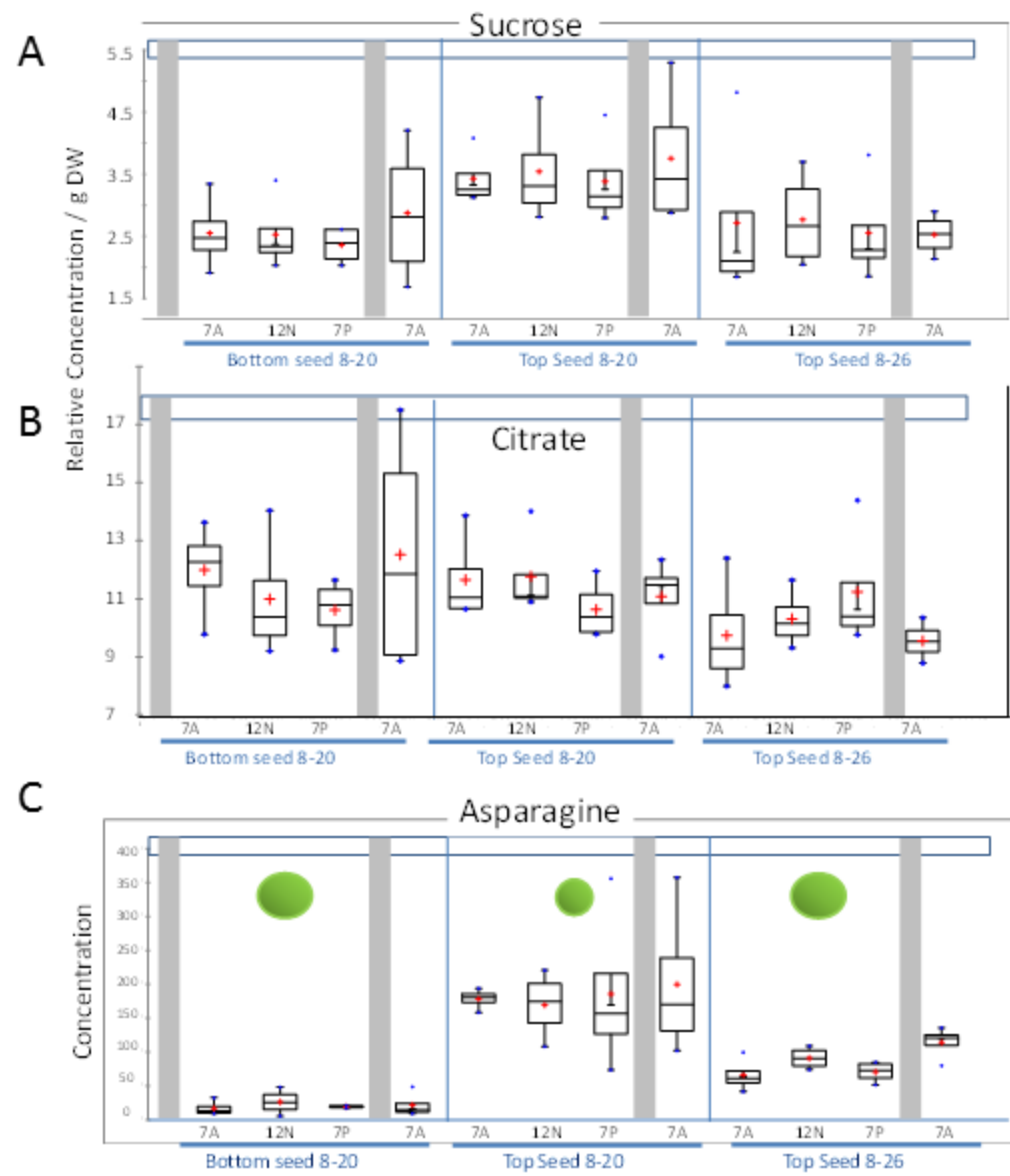

Figure 7

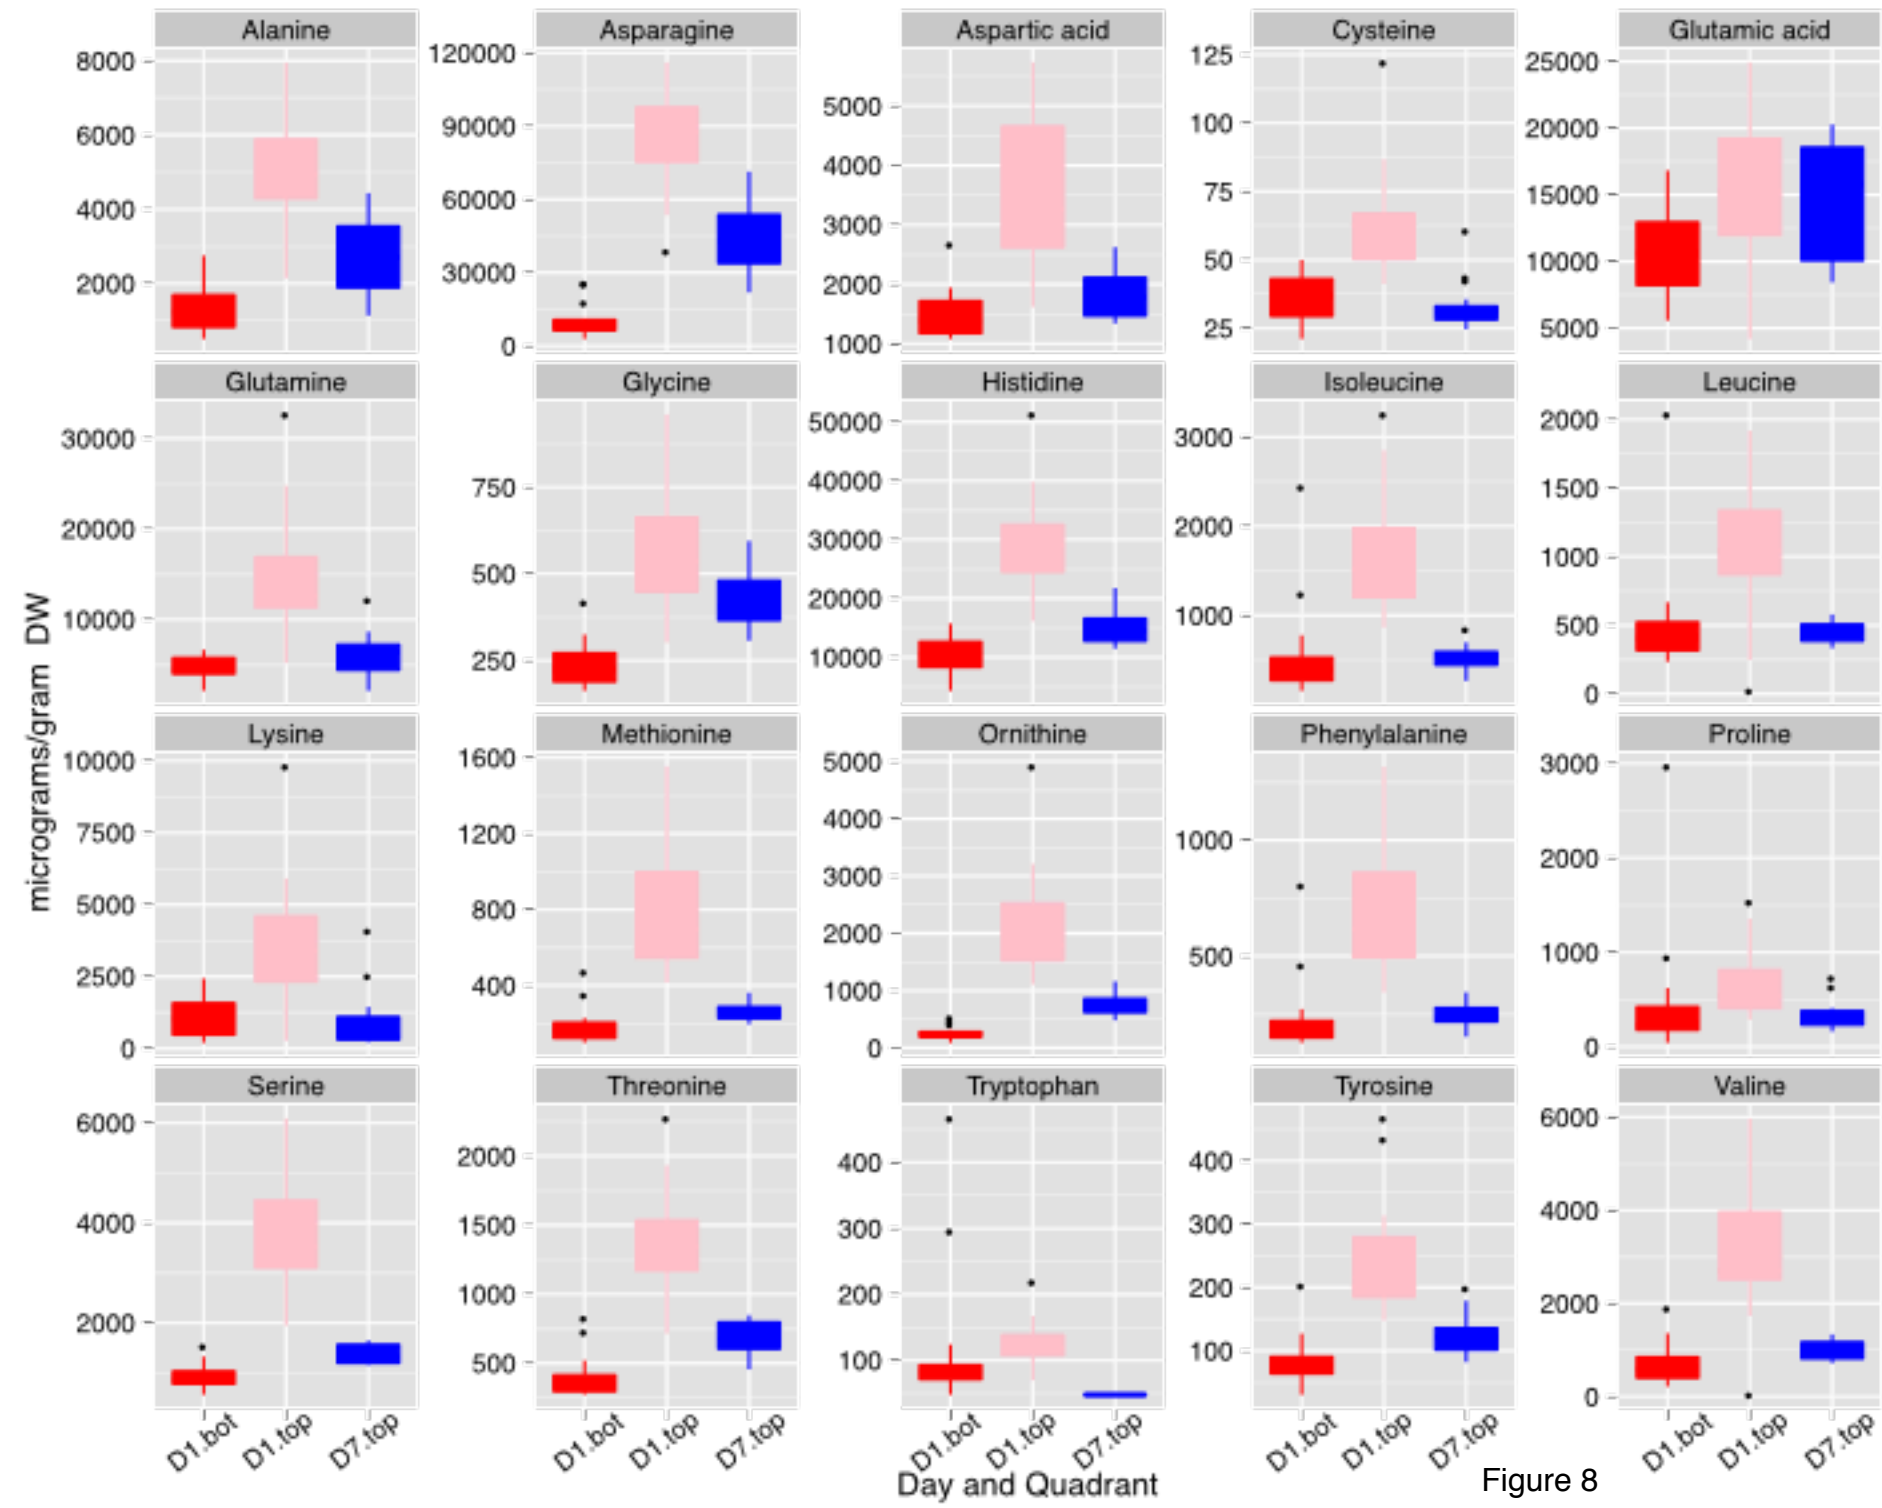

Figure 8



1

## 2 **Supplementary tables and figures**

3 Figure 1—table supplement 1. Indeterminate lines used in the present study and selected  
4 characteristics

5 Figure 1—table supplement 2. Weather summary (June 1– August 31) during the 2010 to 2012  
6 growing seasons

7 Figure 3—table supplement 1. Genotype differences in Seed fill period (SFP) and the difference  
8 in SFP at two node positions (bottom minus top; delSFP)

9

10 Figure 1—figure supplement 1. Absolute mineral concentrations in 3 years of study. The plots  
11 display the quadrant average as a line with the 95% confidence interval calculated using standard  
12 error as the ribbon.

13 Figure 7—figure supplement 1. Experimental protocol for sampling developing soybean seeds  
14 for metabolomic analysis.

15 Figure 7—figure supplement 2. Schematic representation of sample fractionation for global  
16 metabolite analysis.

17 Figure 7—figure supplement 3. Global analysis of metabolome of developing soybean seeds. **A)**  
18 PLS-DA scores plot ( $R^2 = 98.7\%$ ,  $Q^2 = 81.1\%$ ,  $P < 0.001$  by permutation test) of soybean seeds  
19 at different canopy position and time of day. **B)** Variable Importance in the Projection (VIP) for  
20 the first component showing the fifteen most important compounds.

21

**Figure 1—table supplement 1.**

Indeterminate lines used in the present study

| <b>Genotype</b> | <b>MG</b> | <b>Pedigree</b>                                                                                                                                                                                                    | <b>Protein</b> | <b>%PRO<sup>a</sup></b> | <b>%OIL<sup>a</sup></b> | <b>Comments</b>               |
|-----------------|-----------|--------------------------------------------------------------------------------------------------------------------------------------------------------------------------------------------------------------------|----------------|-------------------------|-------------------------|-------------------------------|
| Burlison        | II        | K74-113-76-486 x Century<br>(K74-113-76-486 is Tracy x Pomona)                                                                                                                                                     | medium         | 36.4                    | 17.8                    |                               |
| Chamberlain     | III       | A76-304020 x Land O Lakes Max (A76-304020 is from (Beeson x AP68-1016) x (L15 x Calland) AP68-1016 is from Clark(5) x PI 84946-2 L15 is from Wayne (6) x Clark 63), Max is from [Wayne x (Clark x Adams)] x Cutler | normal         | 32.5                    | 18.8                    |                               |
| Cumberland      | III       | Corsoy x Williams                                                                                                                                                                                                  | normal         | 32.8                    | 19.8                    |                               |
| LG00-13226      | III       | PI 437088A x Burlison                                                                                                                                                                                              | high           | 41.5                    | 15.2                    | Derived from exotic germplasm |
| LG00-3372       | III       | PI 561319A x PI 574477                                                                                                                                                                                             | normal         | 32.1                    | 18.7                    | Derived from exotic germplasm |
| LG00-13365      | II        | Williams 82 x PI 437088A                                                                                                                                                                                           | high           | 40.4                    | 15.8                    | Derived from exotic germplasm |
| LG00-15595      | III       | Williams 82 (3) x Wisconsin Black                                                                                                                                                                                  | medium         | 37.1                    | 17.3                    | Derived from exotic germplasm |
| LN97-15076      | IV        | Macon x Stressland                                                                                                                                                                                                 | normal         | 32.4                    | 18.4                    |                               |
| Logan           | III       | [Beeson x L15 (Wayne (6) x Clark 63)] x Amsoy                                                                                                                                                                      | normal         | 31.9                    | 20.6                    |                               |
| Williams 82     | III       | Williams (7) x Kingwa                                                                                                                                                                                              | normal         | 33.6                    | 18.7                    |                               |
|                 |           |                                                                                                                                                                                                                    |                |                         |                         |                               |
|                 |           |                                                                                                                                                                                                                    |                |                         |                         |                               |

<sup>a</sup>Average values for protein and oil from bottom, mid-bottom, mid-top, and top quadrants from 2012 based on 13% moisture.

**Figure 1—table supplement 2**

Weather summary (June 1– August 31) during the 2010 to 2012 growing seasons

| <b>Year</b>       | <b>Temperature</b> | <b>Precipitation</b> | <b>Comments</b>                                                                                    |
|-------------------|--------------------|----------------------|----------------------------------------------------------------------------------------------------|
| 2010 <sup>a</sup> | Above average      | Above average        | Generally warm spring and record low temperatures set during summer; some severe weather episodes. |
| 2011 <sup>b</sup> | Above average      | Below average        | Hot and humid during July                                                                          |
| 2012 <sup>c</sup> | Above average      | Below average        | Drought conditions during late spring and summer, impacting crop growth.                           |

<sup>a</sup><http://www.crh.noaa.gov/ilx/?n=2010review>

<sup>b</sup><http://www.crh.noaa.gov/ilx/?n=2011review>

<sup>c</sup><http://www.crh.noaa.gov/ilx/?n=2012review>

**Figure 4—table supplement 1**

Genotype differences in Seed fill period (SFP) and the difference in SFP at two node positions (bottom minus top; delSFP)

|                    | Bottom SFP |         |         |             | ave  | Top SFP |         |             | ave        | overall |
|--------------------|------------|---------|---------|-------------|------|---------|---------|-------------|------------|---------|
|                    | 2010       | 2012 NS | 2012 EW | 2010        |      | 2012 NS | 2012 EW | delSFP      |            |         |
| <b>Cumberland</b>  | 41.3       | 47.8    | 51.9    | <b>47.0</b> | 34.2 | 42.4    | 44.1    | <b>40.2</b> | <b>6.8</b> |         |
| <b>LN97-15076</b>  | 40.7       | 50.1    | 51.6    | <b>47.5</b> | 36.4 | 43.3    | 43.7    | <b>41.1</b> | <b>6.4</b> |         |
| <b>LG00-13226</b>  | 37.2       | 45.2    | 44.1    | <b>42.2</b> | 32.2 | 42.4    | 38      | <b>37.5</b> | <b>4.6</b> |         |
| <b>Burlison</b>    | 38.6       | 48.2    | 48      | <b>44.9</b> | 33.2 | 39.3    | 39.8    | <b>37.4</b> | <b>7.5</b> |         |
| <b>LG00-13365</b>  | 31.5       | 46      | 46.5    | <b>41.3</b> | 25   | 37.7    | 35.1    | <b>32.6</b> | <b>8.7</b> |         |
| <b>Logan</b>       | 37.2       | 52.8    | 49.2    | <b>46.4</b> | 32.9 | 43.4    | 40.5    | <b>38.9</b> | <b>7.4</b> |         |
| <b>Chamberlain</b> | 41.8       | 49.9    | 53.3    | <b>48.3</b> | 34.1 | 41.5    | 42.3    | <b>39.3</b> | <b>9.1</b> |         |
| <b>LG00-3372</b>   | 42.2       | 45      | 48.7    | <b>45.3</b> | 32.7 | 41      | 41.8    | <b>38.5</b> | <b>6.8</b> |         |
| <b>LG00-15595</b>  | 40         | 44.3    | 49.9    | <b>44.7</b> | 34.9 | 41.7    | 48.3    | <b>41.6</b> | <b>3.1</b> |         |
| <b>Wms 82</b>      | 38.5       | 48.9    | 49.3    | <b>45.6</b> | 33.4 | 42.8    | 38.9    | <b>38.4</b> | <b>7.2</b> |         |

In 2012, each line was grown in rows with East-West or North-South orientation and values for each are shown and were used to calculate average values for each node position.

Figure 1—figure supplement 1

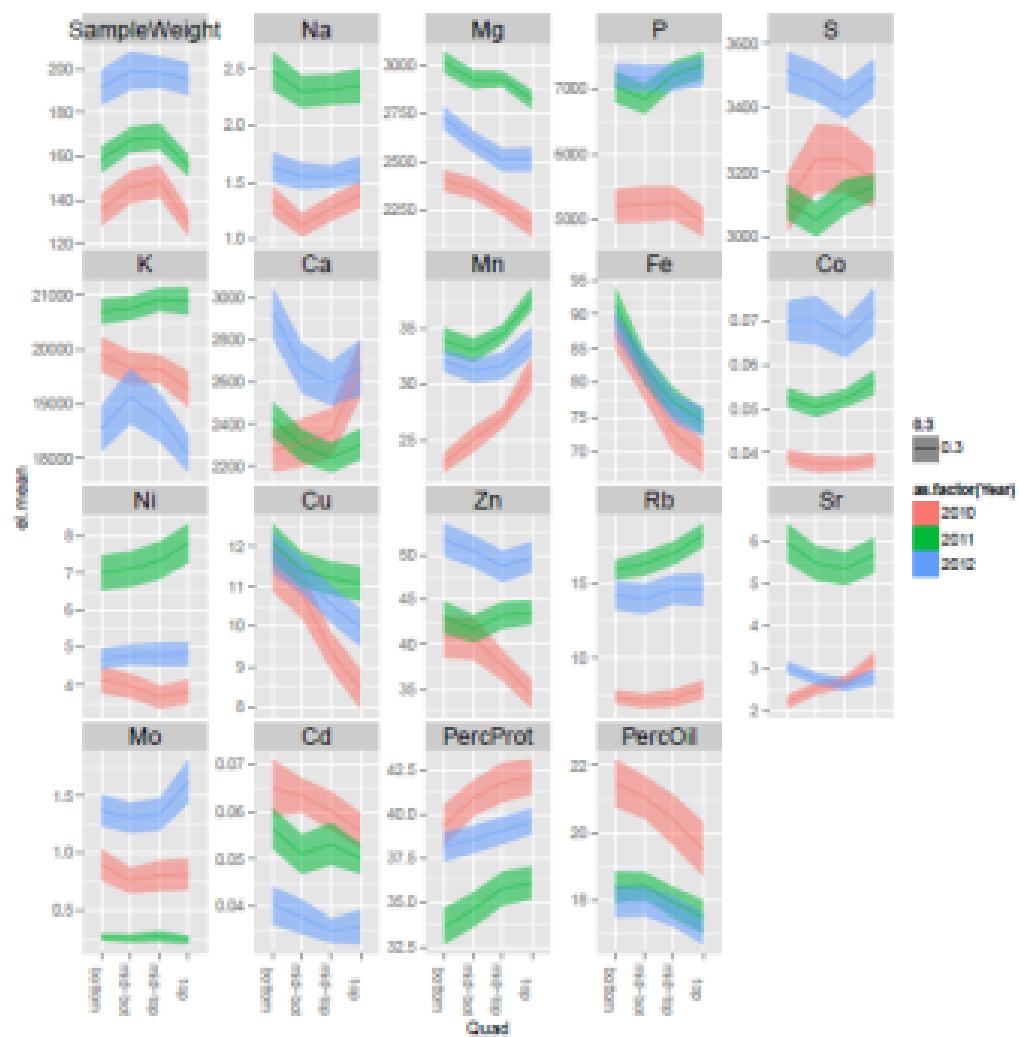

Figure 7—figure supplement 1

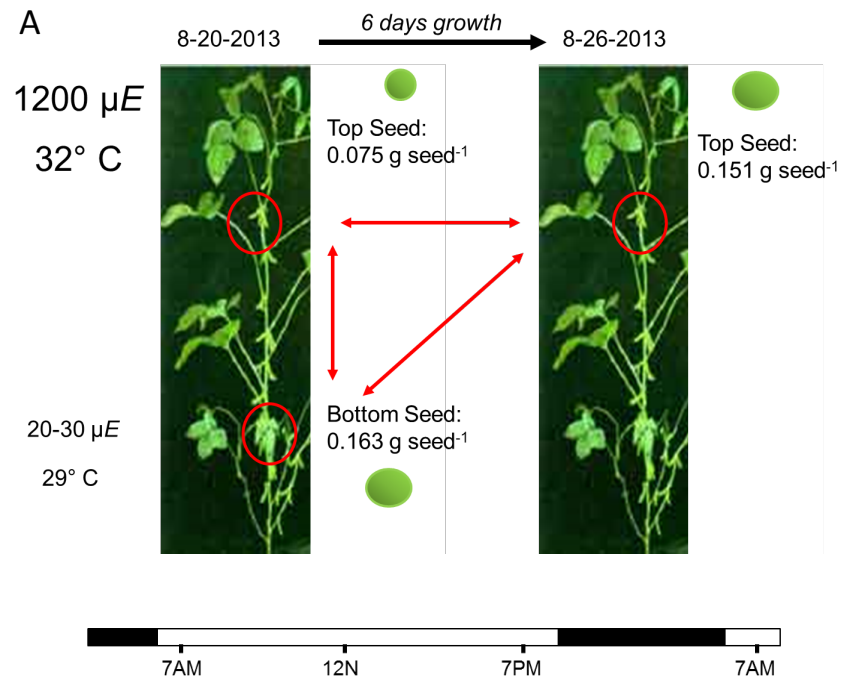

**B**

4 time points X 4 reps

2 canopy positions on 8-20-2013

1 canopy position on 8-26-2013

Figure 7—supplemental Figure 2

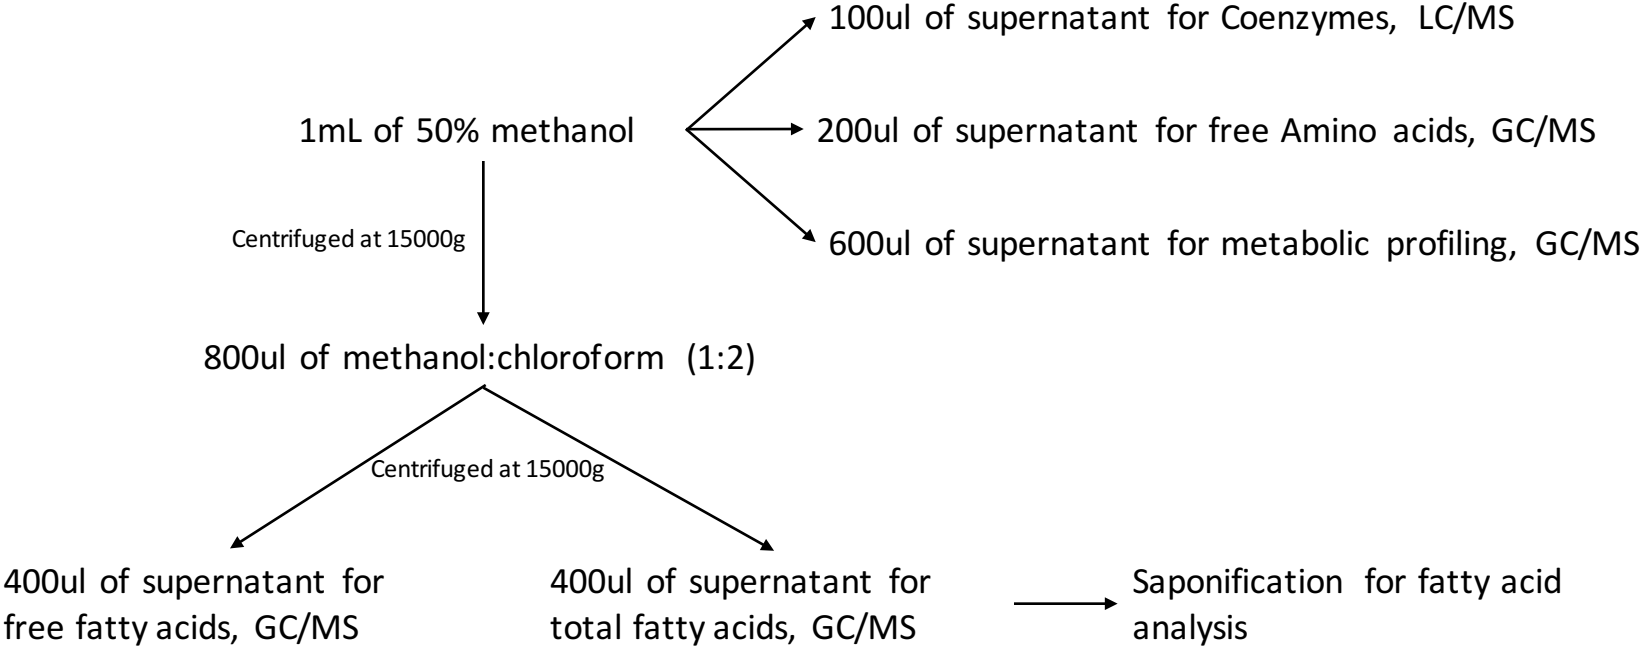

Figure 7—figure supplement 3

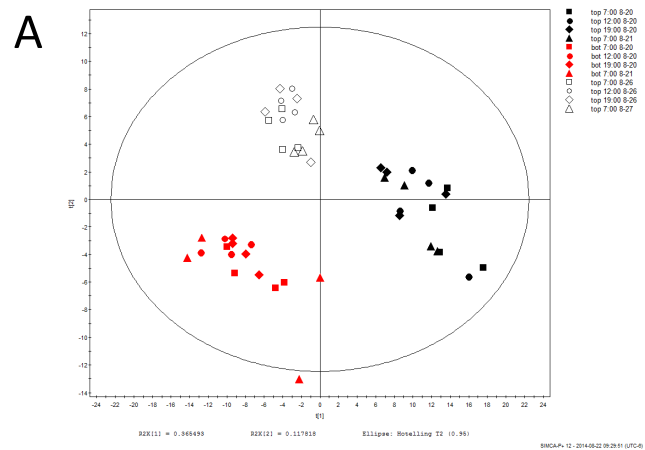

Autoscale and log transformation for A) and B) row normalization for C).

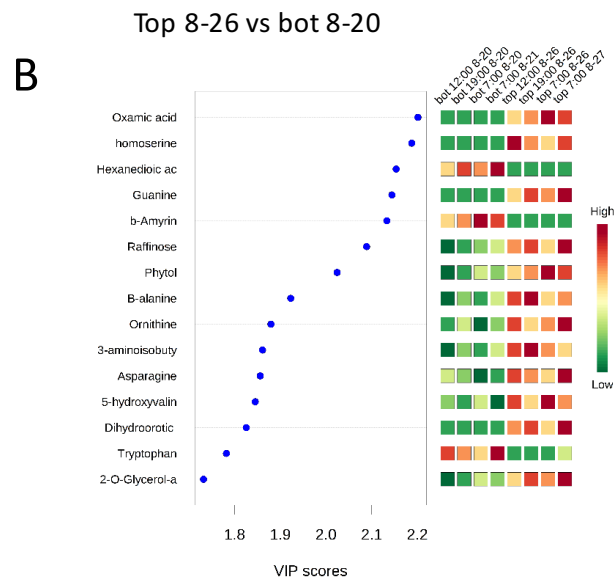

Source: http://biorxiv.org/content/10.1101/036004v2.full.pdf
